1 **Underpinning wheat physiological and molecular responses to co-occurring iron and**  
2 **phosphate deficiency stress**

3 Gazaldeep Kaur<sup>1,2\*</sup>, Vishnu Shukla<sup>1\*</sup>, Varsha Meena<sup>1</sup>, Anil Kumar<sup>1,2</sup>, Jagtar Singh<sup>2</sup>, Pramod  
4 Kaitheri Kandoth<sup>1</sup>, Shrikant Mantri<sup>1</sup>, Hatem Raouhed<sup>3,4,5</sup>, and Ajay Kumar Pandey<sup>1#</sup>

5  
6 Author affiliations

7 <sup>1</sup>National Agri-Food Biotechnology Institute (Department of Biotechnology), Sector 81,  
8 Knowledge City, Mohali-140306, Punjab, India.

9 <sup>2</sup>Department of Biotechnology, Panjab University, Punjab, India.

10 <sup>3</sup>BPMP, Université de Montpellier, INRA, CNRS, Montpellier SupAgro, 34060  
11 Montpellier, France.

12 <sup>4</sup>Department of Plant, Soil, and Microbial Sciences, Michigan State University, East Lansing,  
13 MI 48824

14 <sup>5</sup>Plant Resilience Institute, Michigan State University, East Lansing, MI 48824

15

16 \*Both the authors contributed equally

17

18 #*Corresponding author*

19 Dr. Ajay K Pandey, Scientist-E.

20 National Agri-Food Biotechnology Institute (Department of Biotechnology), Sector 81,  
21 Knowledge City, Mohali-140306, Punjab, India.

22 Telephone: +91-1724990124

23 Email: pandeyak@nabi.res.in; pandeyak1974@gmail.com

24 ORCID iD: <https://orcid.org/0000-0003-1064-139X>

25

26

27

28

29

30

31

32

33

34 **ABSTRACT**

35 Iron (Fe) and phosphate (P) are essential mineral nutrients for plant growth and development.  
36 While it is known that Fe and P pathways interacts within plants however, our understanding  
37 of the molecular mechanisms regulating nutrient interaction during plant vegetative and  
38 reproductive stages remains largely unknown. Herein, we provide a comprehensive  
39 physiological and molecular analysis of hexaploid wheat response to single P/Fe and  
40 combined Fe and P deficiency. Our data showed that wheat primary root growth was  
41 inhibited in response to –Fe, and remarkably rescued by co-occurring deficiencies of Fe and  
42 P. Transcriptome analysis revealed drastic and distinct molecular rearrangements to adapt the  
43 single and combined nutrient stress with dominance of Fe responsive cis-regulatory elements.  
44 Gene-based clustering and root-specific transcriptome expression analysis identify several  
45 important unique components induced in response to combined stress –Fe–P, including UDP-  
46 glycosyltransferases and cytochrome-P450 and glutathione metabolism. These data are  
47 consistent with our metabolome data, which further reveals specific metabolite accumulation  
48 in –Fe–P those include amino-isobutyric acid, arabinonic acid and aconitic acid. Finally, at  
49 reproductive stage alleviations of the negative effect of Fe was also observed in –Fe–P (i.e.  
50 spikelet and grain development). Collectively, the data obtained is essential for designing  
51 new strategies to improve resilience of crops to cope with the limited nutrients in soils.

52

53

54 **Keywords:** iron, phosphate, *Triticum aestivum*, nutrient homeostasis, growth, transcriptome.

55

56 **Highlight:** Hexaploid wheat showed distinct physiological and molecular changes during  
57 single and combined deficiency of iron and phosphate. Alleviations of the negative effect of -  
58 Fe was observed in –Fe–P combined deficiency in the root phenotype and spike  
59 development.

60

61

62

63

64

65

66

67

68

## 69 INTRODUCTION

70 Nutrient deficiencies in plants severely reduce the crop yields and subsequently affect the  
71 worldwide nutrient balance (Marschner, 1995). Fe is an essential microelement for plant  
72 growth and development, utilized in nearly every cellular process ranging from  
73 photosynthesis to respiration. In general, deficiency of iron (Fe), especially in alkaline  
74 calcareous soil considered as one of the most critical limitations in cereal crop production  
75 (Ma and Ling, 2009; Abadia *et al.*, 2011). The rhizospheric region of the plants, including its  
76 composition, pH and oxidation state influences the Fe availability and its uptake mechanism  
77 by the roots (Morrissey and Guerinot, 2009). To overcome Fe-deficiency, plants have  
78 evolved tightly controlled adaptive mechanisms, which involves the developmental response  
79 of root system to maximize Fe acquisition from the soil. Plants recruit two modes of  
80 strategies to transport Fe, strategy I, which is a reduction-based strategy found in non-  
81 graminaceous plants and strategy II which is chelation-based strategy found in graminaceous  
82 species. Strategy I, involves the lowering of the pH of the rhizosphere via excretion of  
83 protons, resulting in reduction of ferric chelate of the root surface and absorption of ferrous  
84 ions across the root plasma membrane (Kobayashi and Nishizawa, 2012). Ferric ( $Fe^{3+}$ ) is the  
85 major abundant form in rhizosphere, which is the insoluble form of iron and cannot be taken  
86 up by the plants. In contrast during the strategy II, the uptake of Fe relies mainly on the  
87 biosynthesis and secretion of phytosiderophores (PS), such as mugineic acids (MAs). These  
88 biochemicals make Fe-PS complexes that are subsequently transported into the roots by  
89 yellow stripe like transporter proteins (YSL) (Curie *et al.*, 2001; Murata *et al.*, 2006; Inoue *et*  
90 *al.*, 2009; Lee *et al.*, 2009; Nozoye *et al.*, 2011; Kobayashi and Nishizawa, 2012). The  
91 molecular players involved in efflux of MA are now characterized in rice barley and very  
92 recently identified in wheat (Nozoye *et al.*, 2011; Kaur *et al.*, 2019). This raises the question  
93 about the extent to which the regulation of Fe homeostasis in monocots (cereals) depends on  
94 the availability of other nutrients.

95

96 Phosphorus (P) is an essential macronutrient for plants to complete their life cycle,  
97 and its deficiency is a major limiting factor in the crop productivity (Raghothama, 1999;  
98 Heuer *et al.*, 2017; Carstensen *et al.*, 2018). Different crops recruit adaptive physiological  
99 and molecular changes to acclimatize to P-deficiency (Rouached *et al.*, 2010; Secco *et al.*,  
100 2017). The P-deficiency response results in multiple root developmental changes to enhance  
101 its acquisition along with the changed expression profiles of important genes involved in Pi

102 transport and distribution (Misson *et al.*, 2005; Bouain *et al.*, 2016). Based on the functional  
103 characterization in model plant *Arabidopsis* (dicots) and in rice (monocots), key players  
104 known to be involved in P starvation are transcription factor PHOSPHATE STARVATION  
105 RESPONSE (*PHR1*), microRNA399 (miR399), PHOSPHATE1 (*PHO1*) and ubiquitin E2  
106 conjugase (*PHO2*) (Cai *et al.*, 2012; Oono *et al.*, 2013; Secco *et al.*, 2013). Root architecture  
107 changes are also reported in response to Pi deficiency (Svistoonoff *et al.*, 2007). For  
108 instance, in *Arabidopsis* the elongation of the primary root is inhibited under low P (Ward *et al.*,  
109 2008b). Key genes involved in this process were discovered including *LPR1* (LOW  
110 PHOSPHATE RESPONSE 1) (), *LPR2*, and PHOSPHATE DEFICIENCY RESPONSE  
111 2 (*PDR2*) those are involved in local Pi sensing at the root tip level (Naumann *et al.*, 2019).  
112 Roots tips are an active site for Pi sensing that is shown to be mediated by SENSITIVE TO  
113 PROTON RHIZOTOXICITY (*STOP1*) and ALUMINUM ACTIVATED MALATE  
114 TRANSPORTER 1 (*ALMT1*) resulting in the accumulation of the apoplastic Fe mediated by  
115 malate (Mora-Macías *et al.*, 2017; Zhou *et al.*, 2020). This suggests that to cope the nutrient  
116 stress, roots also undergo metabolic reprogramming.

117

118 Besides *Arabidopsis*, most of monocot plants including maize, rice and wheat showed  
119 no reduction or slight elongation of primary roots under P-deficiency (Narayanan, A. Reddy,  
120 1982; Mollier and Pellerin, 1999; Shimizu *et al.*, 2004). While in *Arabidopsis* the primary root  
121 inhibition was proposed to be partly due to Fe toxicity at root tip (Ward *et al.*, 2008b), no Fe  
122 toxicity is reported in cereal crops grown under P deficient condition. Thus the overall  
123 performance of the plants depends on the Pi availability and its interaction in the complex  
124 rhizospheric area with Fe and other metals (Bouain *et al.*, 2014; Xie *et al.*, 2019). So how  
125 monocots (cereals) coordinate P and Fe remains largely unknown.

126

127 Given to their opposite charge, Fe (II) is known to readily interact with inorganic  
128 phosphate ( $\text{HPO}_3^-$ , Pi) in the soil or growth medium, near root surface and within the plant.  
129 When both Pi and Fe are absorbed at the same time, availability of both the nutrients gets  
130 affected due to precipitation (Dalton *et al.*, 1983). Multiple studies have provided the  
131 preliminary clue for the probable interaction of P with the absorption of important  
132 micronutrients like iron (Fe) (Chutia *et al.*, 2019; Xie *et al.*, 2019). It has been reported that  
133 under P-deficiency, reduced expression of Fe homeostasis related genes could be due to  
134 enhanced Fe availability to the roots under low P (Hirsch *et al.*, 2006; Ward *et al.*, 2008b).  
135 Although, downregulation of Fe-homeostasis specific genes was observed during P-

136 deficiency, the physiological and molecular effects during combinatorial lowering of P and  
137 Fe remain obscure.

138

139 Wheat is an important crop and is the major source of nutrition. Studying the  
140 molecular attributes of Fe and P crosstalk will help in designing a suitable model to optimize  
141 crop productivity during nutrient deficiency. Nevertheless, to date, despite its primary  
142 interest, a molecular event recruited by wheat to cope with P and Fe combined stress still  
143 waits examination. In the current study we performed a comprehensive analysis of  
144 physiological, transcriptional and metabolic changes in hexaploid wheat under single -Fe and  
145 -P and combinatorial deficiencies of Fe and P (-Fe-P). Special focus was laid to dissect the  
146 underlying molecular events in crosstalk of Fe and Pi during plant growth till their seed  
147 production, by combining transcriptomic and metabolomic approaches. An important role of  
148 genes involved in strategy II mode of Fe uptake under contrasting regimes of P was observed.  
149 Distinct transcriptional and metabolic regulation was observed in the roots of wheat during -  
150 Fe-Pi response. Knowledge gained in this study expands our understanding of how cereal  
151 crops respond to multiple simultaneous nutrient stress and how those are coordinated at the  
152 whole plant level.

153

## 154 **MATERIALS AND METHODS**

### 155 **Plant materials**

156 A bread wheat variety 'C-306' was adopted and grown hydroponically under the Hoagland's  
157 nutrient solution containing ( $L^{-1}$ ): 6 mM  $KNO_3$ , 1mM  $MgSO_4 \cdot 7H_2O$ , 2 mM  $Ca(NO_3)_2 \cdot 4H_2O$ ,  
158 200  $\mu M$   $KH_2PO_4$ , 20  $\mu M$  Fe (III) EDTA, 0.25 mM  $H_3BO_3$ , 0.002 mM  $MnSO_4 \cdot H_2O$ , 0.002  
159 mM  $ZnSO_4 \cdot 7H_2O$ , 0.0005 mM  $CuSO_4 \cdot 5H_2O$ , 0.0005 mM  $Na_2MoO_4$  and 0.05 mM KCL. After  
160 overnight stratification at 4°C, wheat seeds were germinated for 5 days in distilled water.  
161 Once the endosperm starts browning it is removed from the developing seedlings. Seedlings  
162 were then transferred to PhytaBox<sup>TM</sup> and grown in the nutrient solution described above.  
163 After 7 days, nutrient solutions were replaced on the basis of different treatments. For +Fe-P  
164 treatment, 20  $\mu M$   $KH_2PO_4$  was used for P-deficiency. For -Fe+P treatment, 2  $\mu M$  Fe (III)  
165 EDTA was used for Fe-deficiency. While for -Fe-P treatment, 20  $\mu M$   $KH_2PO_4$  and 2  $\mu M$  Fe  
166 (III) EDTA was used for both Fe/P deficiency. For control plants (+Fe+P) concentrations of  
167 nutrients were unchanged in above mentioned Hoagland's solution. After germination, plants  
168 were grown in the described medium for 20 days in growth chamber set at  $20 \pm 1$  °C,  
169 50-70% relative humidity and photon rate of  $300 \mu mol$  quanta  $m^{-2} s^{-1}$  with

170 16h day/8h night cycle. The whole set of experiment was repeated four times to  
171 examine biological variation. For sampling, roots and shoots were collected at different time  
172 points after deficiency (5d, 10d, 15d and 20d). Samples were snap frozen in liquid nitrogen  
173 and stored at -80°C. On the basis of distinct phenotype samples collected at 20 days after  
174 deficiency (DAT) were used for further analysis. To distinctively observe primary root and  
175 1<sup>st</sup> order lateral root, individual plants were moved onto a 150mm wide petriplate filled with  
176 distilled water and characteristics was manually examined. Eight biologicals replicated for  
177 each above-mentioned treatment were used to ascertain root characteristics.

178

179 For the prolonged iron and phosphate deficiency individual seedlings were transferred  
180 into respective pots filled with soilrite (5 seedlings each) in three replicates manner and  
181 allowed to grow in growth chamber set at  $20 \pm 1$  °C, 50-70% relative humidity and photon  
182 rate of  $300\mu\text{mol photons m}^{-2}$  with 16h day/8h night cycle. Pots were watered with Hogland  
183 medium solution with the condition as mentioned above twice a week. The main individual  
184 spikes of the each replicate were tagged at the first day after anthesis (DAA). Total of 15  
185 plants were sampled for each condition. After the maturation of the plants (55 days), spike  
186 tissues (rachis, glumes, awn and seeds) were harvested and images were processed. For  
187 comparing morphological differences, length and total weight of matured spike tissues from  
188 each condition was measured.

189

### 190 **RNASeq experiment design and sequencing**

191 Wheat 20 days old root tissue samples for the four conditions (+Fe+P, +Fe-P, -Fe+P and -  
192 Fe-P) with at least two to three biological replicates derived from at least two independent  
193 RNA extractions were pooled together. Each of biological replicates consists of 12-15  
194 seedlings per treatment. Samples were collected at the same time, snap frozen in liquid  
195 nitrogen and stored at -80°C. The RNA extraction as well as Illumina sequencing was  
196 performed for two biological replicates for -P and three for -Fe-P with their respective  
197 controls. For Fe-deficiency, previously published RNAseq datasets were used (Kaur *et al.*,  
198 2019). RNA extraction for library construction from the control and treated root samples was  
199 performed as reported earlier (Kaur *et al.*, 2019). Briefly, sequence libraries were prepared  
200 from high quality, quality control passed RNA samples using Illumina TruSeq mRNA library  
201 prep kit as per the instructions (Illumina Inc., USA). The reads were sequenced using 2 X 150  
202 bp chemistry on NextSeq 500 and NovaSeq6000.

203

## 204 **Sample clustering and differential expression analysis**

205 Paired-end reads were quality trimmed and adapter filtered using Trimmomatic v0.35 to  
206 retain only good quality reads (QV>20). The clean raw reads were quantified for expression  
207 by pseudoalignment against wheat transcriptome (ensembl release 46) using Kallisto v0.44.0  
208 (Bray *et al.*, 2016), using the option --rf-stranded for stranded samples. DESeq2 R package  
209 (Love *et al.*, 2014) was used for differential expression analysis. Raw counts values from  
210 Kallisto were summarized from transcript to gene level abundances and imported for use with  
211 DESeq2 using tximport package (Soneson *et al.*, 2015). Principal Component analysis (PCA)  
212 was performed based on VST transformed counts for all samples to observe clustering across  
213 replicates and conditions. The samples from batches were taken together to build a DESeq2  
214 model to obtain normalised counts, which were transformed using VST mode and corrected  
215 for the associated batch effect using remove Batch Effect function from limma package  
216 (Ritchie *et al.*, 2015). ggplot2 package (Wickham, 2017) was used to design the PCA plot.  
217 Clustered heatmap for selected 500 genes with highest variation in expression among the  
218 conditions was generated using pheatmap package.

219

220 For differential expression analysis, DESeq() function was used to calculate the  
221 relative expression for the pairwise comparisons among conditions. Log2 Fold Changes  
222 (LFC) were obtained for the pairwise comparisons for each of the three deficiency conditions  
223 w.r.t. control (+Fe+P) from the respective batch group only, so as to avoid any variation due  
224 to batch effects. The relative expression ratios were shrunk using apeglm package (Zhu *et al.*,  
225 2018) to adjust the LFC of genes with extremely low counts.

226

## 227 **Functional enrichment analysis and annotation**

228 KOBAS (KEGG Orthology-Based Annotation System) standalone tool was used to firstly  
229 annotate wheat genes based on blast mapping against rice RefSeq and RAP-DB sequences, e-  
230 value <math>10^{-5}</math>. For pathway enrichment analysis, identify module was used to shortlist the  
231 significantly overrepresented KEGG pathways for the respective deficiency conditions using  
232 Fisher's exact test. FDR correction was performed using Benjamini and Hochberg method.  
233 Also, MapMan (Thimm *et al.*, 2004) was used to map the DEGs onto metabolic, regulatory  
234 and other biological categorical pathways. The mapping file was generated through Mercator  
235 (Lohse *et al.*, 2013), using the wheat transcriptome fasta file as an input. In addition, wheat  
236 RefSeq v1.1 annotation released by International Wheat Genome Sequencing Consortium  
237 (IWGSC) was also used (<https://urgi.versailles.inra.fr/download/iwggsc>).

238

### 239 **Identification of cis-regulatory elements**

240 To check the extent of Fe or P specific transcriptional regulation in –Fe, –P as well as  
241 combined deficiency of –Fe–P, 2000 bp upstream promoter region sequences for the three  
242 sets of DEGs were downloaded from Ensembl Biomart. The promoter sequences were  
243 checked for presence of 115 frequent cis-regulatory elements (freq-CREs) enriched in  
244 clusters for gold standard (GS) Fe responsive genes (Schwarz et al., 2020) and phosphate  
245 regulation specific CREs using an in-house perl script (link). For validation and comparison,  
246 three sets of control groups with 100 promoters each were randomly shortlisted from genes  
247 that were not altered in response to Fe-deficiency ( $-0.5 > \text{LFC} < -0.5$ ).

248

### 249 **Gas chromatography–mass spectrometry metabolite profiling**

250 Extraction of total metabolites was performed similarly as previously described (Wang et al.,  
251 2018; Kaur et al., 2019). Wheat roots subjected to +Fe+P, +Fe–P, –P +Fe and –Fe–P were  
252 sampled at 20 days after deficiency in triplicate manner and processed for metabolite  
253 extraction. The derivatized metabolites were analysed with a GC instrument (Agilent  
254 technologies 7890, USA) coupled with mass spectrometry. Measurement from an injection  
255 volume of 1  $\mu\text{l}$  was taken in split-less mode in DB-5 column (30 m  $\times$  0.25 mm, 0.25  $\mu\text{m}$  film  
256 thickness, Agilent) using helium as carrier gas. For analysis, qualitative analysis of  
257 chromatograms was performed in MassHunter Qualitative analysis Sp1 workstation (Agilent,  
258 USA). Identification and annotation of each compound was supervised manually using  
259 AMDIS software and NIST08 database (<http://www.nist.gov/srd/mslist.html>). Data were  
260 normalized to sample weight and internal control (sorbitol). Statistical analysis was  
261 performed as described earlier (Quanbeck *et al.*, 2012). Log<sub>2</sub> ratio of metabolite abundances  
262 in tested conditions was plotted against control condition (+Fe +P). Delta method  
263 approximation was used to calculate standard errors (se) of log-ratio,  $\text{se log-ratio} = 1/\ln$   
264  $2\sqrt{[(\text{SE}_T/T)^2 + (\text{SE}_C/C)^2]}$ , where  $\text{SE}_T$  and  $\text{SE}_C$  are standard errors of average test and control  
265 metabolite abundances. For PCA and hierarchical clustering analysis, clustvis  
266 (<https://biit.cs.ut.ee/clustvis/>) online program package with Euclidean distance as the  
267 similarity measure and hierarchical clustering with complete linkage was used. A tab-  
268 delimited file was used as input comprising of annotated metabolites with their corresponding  
269 log transformed concentration values in triplicates for each condition.

270

### 271 **Quantitative real time-PCR (qPCR) analysis**



272 Total RNA was isolated from the roots of the 20 DAT (days after treatment) seedlings. A  
273 total of 2ug of RNA was used to prepare cDNA by using SuperScript III First-Strand  
274 Synthesis System (Invitrogen, USA). For removing the genomic contamination in the RNA  
275 sample, they were pre-treated with TURBO DNA-free kit (Ambion, TX, USA). To perform  
276 quantitative RT-PCR (qRT-PCR) amplification was performed using gene specific primers  
277 (Table S1) along with internal control ARF (ADP-Ribosylation Factor) to normalize the  
278 expression data for each gene by the using of Ct method [ $2^{-\Delta\Delta Ct}$ ] in the CFX96<sup>TM</sup> Real-Time  
279 PCR System (BioRad Inc, USA). Two or three independent replicates with four technical  
280 replicates were performed for each sample. The relative amount of gene expression was  
281 calculated by  $2^{-\Delta\Delta Ct}$  method (Livak and Schmittgen, 2001) for every cDNA samples.

282

### 283 **Metal analysis in wheat tissues, Perl staining and root Fe mobilization assay**

284 Seed phosphorus and different metal analysis was performed using Inductive Coupled  
285 Plasma-MS (ICP-MS). Metal analysis was performed as described previously (Bhati *et al.*,  
286 2016; Aggarwal *et al.*, 2018). Briefly, the mature seeds were grounded to fine powder and  
287 subsequently subjected to the microwave-digested with HNO<sub>3</sub> (SuraPure<sup>TM</sup>, Merck).  
288 Respective metal standards were also prepared for analysis. Three independent replicates  
289 were performed for each 20 DAT samples. For Perl staining, wheat roots were incubated with  
290 Perl's Prussian blue (PPB) method consisting of with equal amount of premixed solution of  
291 4% (v/v) HCL and 4% (w/v) Potassium hexacyanoferrate (II) trihydrate. Roots of eight to ten  
292 wheat seedlings from each experiment were taken and incubated in above solution mixture  
293 for 30 mins. Blue colour Fe-plaques were observed for the presence of Fe on the wheat roots  
294 seedlings and representative images (five seedlings per treatments) were taken for respective  
295 treatments. To estimate the PS release, Fe remobilization assays of wheat roots was  
296 performed in aerobic condition as described earlier in detail (Takagi, 1976; Kaur *et al.*,  
297 2019). For PS release twenty-five wheat seedlings undergoing the respective treatments were  
298 used for release in 60 ml deionised water in presence of Micropur (Katadyn, Switzerland).  
299 The final concentration of the released ferrous ion was estimated by measuring OD at 562  
300 nm.

301

### 302 **Statistical data analysis and data availability**

303 To identify significant differentially expressed genes, a cut-off criterion of LFC > 1 in either  
304 direction, with an adjusted p-value (padj) of less than 0.05 was set. The padj values were  
305 obtained by using the Benjamini and Hochberg approach for controlling the false discovery

306 rate. The RNAseq data generated in this study has been deposited under the NCBI SRA  
307 database BioProjectID (submission pending).

308

## 309 **RESULTS**

310

### 311 **Fe and P interplay to regulates Fe uptake.**

312 Wheat responses to either Fe or P deficiency are fairly documented at physiological and  
313 molecular level (Oono *et al.*, 2013; Kaur *et al.*, 2019). But little information is available on  
314 how wheat integrates simultaneous Fe and P stress and how wheat adjusts its growth capacity  
315 accordingly. Therefore, we compared wheat growth under four growth conditions, namely  
316 nutrient-sufficient (+Fe+P), single nutrient deficiency (-Fe+P, +Fe-P), and combined  
317 nutrient deficiency (-Fe-P). Short (5 days post treatment, dpt), medium (10 dpt) and long-  
318 term (20 dpt) effects of these nutritional growth conditions on wheat morphology and  
319 biomass allocation pattern were assessed. At all the time points, Fe-deficient plants displayed  
320 shorter roots compared not only to control (+Fe+P) plants but also to plants grown on -P and  
321 -Fe-P conditions (Figure 1A & B). The primary root length significantly increased during -P  
322 condition. Interestingly, combined Fe and P (-Fe-P) lead to the recovery of total primary root  
323 elongation, thus alleviating the negative effect of Fe-deficiency (Figure 1C). Similar trend  
324 was also observed for the number and length of the 1<sup>st</sup> order lateral roots which shows  
325 significant increase during -P and -Fe-P conditions compared to just Fe-deficient and  
326 control plants (Figure 1D and E). Examination of the fresh biomass allocation patterns from  
327 shoot to root was assessed as well. The total plant biomass was higher in control seedlings  
328 (~1.7 grams) and lowest in -Fe-P condition (~0.6 grams) (Figure 1F). While, wheat roots  
329 under -Fe showed very low allocation of root and the allocation pattern of biomass in -P and  
330 -Fe-P plants were similar (Figure 1F). Collectively our data suggests that Fe and P crosstalk  
331 and thereby are able to regulate the root characteristic.

332

333 The availability of P or Fe was shown to influence the uptake of Fe or P respectively,  
334 and perhaps better characterized in *Arabidopsis* (Ward *et al.*, 2008a). Nevertheless, this key  
335 step for P and Fe in wheat is not well studied. To test the effect of P or Fe availability on P or  
336 Fe uptake ICP-MS analysis, Pi uptake, Perl's staining (for Fe) of the roots were performed.  
337 As expected, the accumulation of Pi was reduced either in -P or -Fe-P treatments. In our 20  
338 dpt roots, Fe-deficiency does not influence Pi uptake under single -Fe+P deficiency (Figure  
339 2A). In contrast, ICP-MS analysis revealed that only during P-deficiency conditions

340 significant increase in the accumulation of Fe in the roots was observed compared other  
341 treatments (Figure 2B). In addition to this, wheat roots showed higher Zn accumulation under  
342  $-Fe-P$  and Mn in  $+Fe-P$  condition (Figure 2B). In shoots, only Mn was accumulated in  
343 higher amount during  $-Fe-P$ . Perl's staining analysis showed no visual presence of Fe in  
344 roots under  $-Fe$  and  $-Fe-P$  conditions (Figure 2C). Enhanced Fe-plaque colorization under  $-$   
345 P conditions and mild staining in  $+Fe+P$  roots was observed (Figure 2C). This suggests that  
346 Fe is aggressively taken up by the plant roots under  $-P$  conditions. A key aspect of Fe uptake  
347 in cereals is the release of PS for Fe remobilization (Römheld and Marschner, 1986;  
348 Römheld, 1991). Accordingly, our assays revealed a high release (42-47 nM) of PS under  $-$   
349 Fe condition (10 dpt) (Figure 2D). While, the PS release decreased during  $-Fe-P$  condition  
350 (16-18 nM) compared to  $-Fe$  conditions, significantly higher compared to  $-P$  (8-9 nM) and  
351 controls (2-3 nM) conditions (Figure 2D). This data indicates that the presence of P is  
352 necessary for the wheat roots to respond to Fe deprivation so as to enhance the release of PS.  
353

#### 354 **Comparative analysis of normalized RNAseq expression**

355 Nutrient deficiency alters plant transcriptomes. We recently showed that Fe deprivation  
356 results in important global gene expression reprogramming in wheat (Kaur *et al.*, 2019). But  
357 how combined Fe and P influence transcriptome remains unknown. Therefore, we set out to  
358 gain insight of the transcriptional response upon combined Fe and P deficiency stress (20 dpt)  
359 through RNAseq. In all, 240,013,343 million quality filtered reads with 89% reads having  
360 quality score  $\geq$  Q30 were used for the differential expression analysis using the Kallisto-  
361 DESeq2 pipeline (Bray *et al.*, 2016; Love *et al.*, 2014). In response to  $-P$  condition, 2983 and  
362 802 genes were downregulated and upregulated respectively (Figure 3A, Table S2).  $-Fe-P$   
363 combined stress cause an upregulation and downregulation of 1829 genes and 951 genes  
364 respectively (Table S2). Refined analysis of our previous  $-Fe$  transcriptome subsequently  
365 identified 2055 up- and 2191 downregulated genes as  $-Fe$  response w.r.t. control (Figure 3A)  
366 (Kaur *et al.*, 2019), the Venn diagram revealed those genes that are unique or commonly  
367 regulated by Fe and P (Figure 3B and Table S3, S4). Finally, clustered heatmap analysis of  
368 all 4 transcriptomes revealed that the transcriptome of control and  $-Fe-P$  plants were closer,  
369 and distant from those of single Fe or P deficiency conditions (Figure S1A & B).  
370 Furthermore, clustered heatmap analysis of the top upregulated genes (top 100 genes) across  
371 all treatments suggested that expression of these genes was similar in  $-Fe$  and  $-Fe-P$   
372 conditions (Figure 3C). In contrast, most of the strongly downregulated genes (left panel)

373 showed similar patterns during –Fe and –P. This suggest that wheat roots respond to dual  
374 deficiency of Fe and P.

375

### 376 **Specific and overlapping genes regulated by Fe and/or P deficiency in wheat roots**

377 Under the P-deficiency, wheat induces genes for key transcription factors (Table S5)  
378 including PHOSPHATE STARVATION RESPONSE (PHR) homologs and its targets such  
379 as PHO1;H1, TaIPS1. Phosphatase related genes like phosphate starvation-induced gene 2  
380 (PS2) were induced, whereas downregulation of PURPLE ACID PHOSPHATASE (PAP)  
381 and UDP-GLYCOSYLTRANSFERASES genes was noted (Table S2). Additionally, SPX  
382 domain genes also showed induced expression. Our analysis confirmed the P-deficiency  
383 response in wheat roots. In contrast, 8 genes encoding for UDP-  
384 GLYCOSYLTRANSFERASE were induced during –Fe–P. Glutathione S-transferase, NBS-  
385 LRR family, chaperone related genes, ABC and ion transporters were also highly expressed  
386 in response to –Fe–P. Additionally, three putative nitrate transporters-NRT  
387 (TraesCS5A02G388000; TraesCS7A02G428500; TraesCS3B02G285900) and a gene  
388 encoding for nitrate reductase were remarkably downregulated. These expression responses  
389 marked the characteristic–Fe–P response in wheat roots along with the downregulation of  
390 stress responsive genes including hydrolase and ATP binding proteins (Table S2).  
391 Phytohormone genes such as auxin pathway and including PIN and IAA sub-family genes  
392 were significantly expressed in –Fe–P (Figure 4A, Table S6). Overall, our data indicates that  
393 auxin biosynthesis and secondary metabolism genes for lignification were highly active in the  
394 –Fe–P that could support the root phenotype (Figure S2). Interestingly, the overlapping  
395 response of transcripts altered during –P and –Fe–P was found to be very low (15.79%), and  
396 included multiple PSR responsive/regulated genes (Figure 4B, Table S7). Total of 39 genes  
397 were commonly upregulated specifically by –P and –Fe–P. Genes encoding for Glycine-rich  
398 cell wall structural proteins were highly upregulated in both conditions (Table S8). In  
399 contrast, 110 genes were commonly downregulated during these two conditions. Among the  
400 common list peroxidase and proteases were highly repressed. 206 genes showed contrasting  
401 expression in –P and –Fe–P, with number of germin-like protein encoding transcripts, and  
402 GDSL esterase, CytP450, Glutathione S-Transferase and ABC transporters (Table S8).

403

404 Interestingly, the overlapping response of transcripts specifically during –Fe and –Fe–  
405 P was found to be comparatively high (24.96%). Comparative –Fe (Kaur *et al.*, 2019) and –  
406 Fe–P transcriptome analysis revealed that 83.65% of–Fe alone DEGs were no longer

407 differentially expressed under the combined –Fe–P treatment (Figure 4C). This suggests that  
408 plant use reprogrammed pathways to respond in dual nutrient deficiency as compared to  
409 response during single deficiency stress. In total, 494 genes were coregulated irrespective of  
410 presence or absence of P, among these 84 genes were observed to be significantly altered in  
411 all three deficiency conditions. While 410 genes were commonly regulated by Fe-deficiency,  
412 either upregulated (i.e. nicotianamine synthase genes-NAS, basic helix loop helix-bHLH and  
413 WRKY transcription factors, and transporters viz., ZIFL, YSL, NRT1) or repressed (i.e.  
414 ABC-G family peroxidases, arabinogalactan protein encoding, sulfate transporter, ferritin and  
415 loricrin like genes) regardless of P status in the growth medium. 200 genes showed opposite  
416 expression pattern mainly including no apical-meristem (NAC) domain containing, cobalt-  
417 ion protein encoding , glycosyltransferases and zinc transporter genes were marked by this  
418 category (Table S9).

419

420 During –Fe or in –Fe–P, multiple genes involved in Fe homeostasis were induced  
421 suggesting that presence of P does influence the expression of Fe related genes. Furthermore,  
422 93 Fe starvation responsive genes (FSR; Strategy I and II) were checked for their expression  
423 response (Table S7). Most of the FSR genes showed downregulation in P-deficiency, but  
424 were upregulated either in –Fe+P or –Fe–P (Figure 4D). Up-regulated genes also included  
425 those involved in biosynthesis of PS *via* methionine cycle. Lastly, 84 genes were commonly  
426 altered in all three growth conditions i.e. +Fe–P, –F+P and –Fe–P (Table S9). Only one  
427 fourth of these genes were significantly commonly upregulated such as WRKY transcription  
428 factor and genes encoding SPX domain containing protein. 62 genes were downregulated  
429 including ABC-G family, and TaYSL12 encoding genes.

430

#### 431 **KEGG pathway enrichment analysis of DEGs and metabolome analysis**

432 Mapman based analysis suggest that high expression of genes involved in UDP-glycosyl-  
433 transferases and GST related pathways during –Fe–P, when compared to other treatments and  
434 controls (Figure 5A). Overall, our data indicates that auxin biosynthesis and secondary  
435 metabolism genes for lignification were highly active in –Fe–P response (Figure S2, S4). To  
436 further categorise the DEGs from each nutritional growth conditions in their corresponding  
437 metabolic pathways we mapped them to the KEGG database. Our analysis revealed that in  
438 response to P-deficiency (+Fe–P), genes related to phenylpropanoid pathway, photosynthesis,  
439 ABC transporters, and genes for nitrogen metabolism were highly enriched (Figure 5B). In  
440 response to –Fe–P conditions, enrichment of genes involved in glutathione metabolism,

441 glycerophospholipid metabolism, starch and sucrose metabolism and galactose metabolism  
442 pathways and cysteine and methionine metabolism was observed (Figure 5B). Interestingly,  
443 enrichment of cysteine and methionine metabolism genes was also observed in response to –  
444 Fe+P treatment (Kaur *et al.*, 2019), indicating that the enrichment of genes is Fe specific, and  
445 independent of P status.

446

447 To further study the role of primary metabolites during the Fe and P interaction GC-  
448 MS analysis was done using the fresh roots of the wheat seedlings post 20 dpt. Our analysis  
449 showed that significant variation in the accumulation of metabolites between nutrient-  
450 deficient and nutrient-sufficient plants along with a variation amongst nutrient deficiency  
451 treatments (Figure 6A, Table S10). While suppression of oxalic acid and increase in 4-  
452 ketoglucose levels was unique for –P treatment, the increase in fumaric acid and myo-inositol  
453 marked metabolic change was specific for –Fe conditions. A contrasting level of serine and  
454 succinic acid in +Fe–P (low) and –Fe+P (high) was found to be normalized in dual deficiency  
455 with respect to control. The –Fe–P conditions is characterized by specific metabolic changes  
456 marked by decrease in acetic acid, butanoic acid, valine, threonine and glucofuranoside levels  
457 and increased accumulation of  $\beta$ -amino-isobutyric acid, strearic acid, arabinonic acid and  
458 aconitic acid. Nevertheless, numerous metabolites decreased commonly in –Fe–P and –Fe  
459 conditions such as aspartic acid, hexonic acid, glucose cystathione and, alanine. While the  
460 acids showed high accumulation in –Fe they were highly reduced during –Fe–P. The  
461 metabolites that decrease in –Fe–P appeared to follow the same trends in –P conditions  
462 including citric acid and hexapyranose. Finally, sugars, sugar conjugates (i.e. d-ribofuranose,  
463 a-d-galactopyranoside, a-d-mannopyranoside), amino acids (i.e. b-aminoisobutyric acid,  
464 cystathione and L-alanine), aconitic acid and arabinonic were predominant in –Fe–P  
465 conditions (Figure 6B).

466

#### 467 **Enrichment of Fe responsive cis-regulatory elements in regulated genes**

468 To get an insight into the regulatory function of the expressed genes during single (–Fe, –P)  
469 and combined (–Fe–P) nutrient stress, Fe responsive cis-regulatory elements were analysed.  
470 Our analysis revealed multiple TFs that are predominantly expressed in –Fe–P condition as  
471 compared to P-deficiency (Table S5, Figure S5). Especially, genes encoding for multiple  
472 bHLH, C2H2 and NAC TFs were highly represented in –Fe–P. Earlier the comprehensive  
473 resource of new putative frequent cis-regulatory elements (freq-pCREs) were identified in the  
474 gene clusters responsive for Fe-deficiency in roots (Ivanov *et al.*, 2012; Schwarz *et al.*, 2020).

475 Herein we included genes differentially regulated in response to the deficiency of Fe and/or  
476 P. To optimize and validate our analysis, we used three control sets of genes (~100) with  
477 log<sub>2</sub>FC between -0.5 and 0.5 in -Fe w.r.t to control and checked for the occurrence of freq-  
478 pCREs in their promoters. All the random sets behaved in a similar pattern with low presence  
479 of these elements (Table S11). Our analysis identified that differentially accumulated  
480 transcripts are enriched with the uniform percentage distribution of freq-pCREs. To address  
481 the mechanistic understanding of Fe responsive freq-CREs, analysis was done in subset of  
482 FSR genes and PSR genes. Interestingly, when FSR and PSR related genes were analysed  
483 this balance was found to be perturbed. The dominance and biasness of freq-pCREs was  
484 observed significantly in Fe deficiency (Table 1). For example, cis-domains such as AAGTA,  
485 ACTAGT, CACACG, AATTGC and CGTGCC were present in higher proportion in Fe-  
486 deficiency responsive genes as compared to P deficiency. Our work revealed an overlapping  
487 response of DEGs during Fe and P deficiency as freq-pCREs were highly enriched in Fe-  
488 deficiency and was present in the promoters of P response related genes. Similarly, cis-  
489 element for phosphate responsive region such as P1BS (PHR1 binding sequences,  
490 GNATATNC) was present at 62% of the PSR and 23.66% of FSR genes (Table S12).  
491 Interestingly, P1BS motif was present 34.97, 34.61% and 36.91% in the promoter regions of  
492 DGEs in response to -Fe+P, +Fe-P and -Fe-P respectively.

493

#### 494 **Effect of prolonged Fe and P deficiency on the panicle development**

495 So far, investigation of Fe and P focused on their individual and combined effect in model  
496 plants. But, how long-term Fe and/or P deficiencies affects late stage of crop is largely  
497 unknown. Therefore, we assessed the physiological and molecular responses of wheat plants  
498 subjected to prolonged periods and effect of Fe and P deficiency (Figure 7A). In 55 days old  
499 wheat plants, Fe-deficiency causes the most severe effects on productivity, spike length, and  
500 rachis development compared to other treatments (Figure 7B, C & D). Strikingly, Fe starved  
501 plants showed no seed setting and this phenomenon correlated with the decrease in the length  
502 of awn and rachis. The above-mentioned developmental effects were less predominant under  
503 prolonged -P condition. Interestingly, the negative effect of prolonged exposure of Fe  
504 deprivation on spikelet development is rescued by the -Fe-P treatment. Our result show that  
505 removal of P along with Fe was able to rescue the growth retardation in spike and seed  
506 development. Overall, our data suggest that the inhibitory effect caused by Fe-deficiency on  
507 wheat development could be minimized by subjecting the seedlings to P deprivation.

508

## 509 **DISCUSSION**

510 Fe and P are essential elements for plants, utilized in nearly every cellular process. In crops,  
511 there is limited understanding of the interaction between Fe and P homeostasis to coordinate  
512 physiological and molecular response. The current work aimed to fill this knowledge gap by  
513 providing first insight on wheat response to Fe and/or P deficiency stresses. Our data showed  
514 that P-deficiency compensates Fe negative effect on wheat growth and development such as  
515 root growth and spike development. Our transcriptome analysis suggests the enriched  
516 presence of putative Fe responsive cis-regulatory binding sites. By combining transcriptome  
517 and metabolome analysis, we revealed a specific component underlying during Fe and P  
518 combined stress response in wheat.

519

520 To sustain the Fe or P deficiency in soil, crop plants like rice, maize and soybeans  
521 have adapted multiple strategy responses so as to maximize their survival under depleted  
522 soils. But how crop plant responds to co-occurring Fe and P stress remains poorly  
523 understood. Our study revealed that Fe uptake is dependent on P status in the rhizospheric  
524 region. The enhanced accumulation of Fe could be accounted for by the continued expression  
525 of Strategy-II related genes (Figure 2D and Figure S3B). These observations are in line with  
526 early work where we showed that wheat use Strategy-II genes to respond to Fe-deficiency  
527 (Kaur *et al.*, 2019). Genes expressed in response to –Fe and –Fe–P reinforce thus that wheat  
528 primarily uses Strategy-II mode for Fe uptake even during changing regimes of P. For  
529 instance, the relatively high release of PS and gene expression patterns of certain specific  
530 YSL, metal transporters and a few TFs involved in metal homeostasis either in –Fe or –Fe–P  
531 confirms that wheat primarily utilizes Strategy-II mode of Fe uptake route to mobilize Fe  
532 from roots to shoots even under P-deficiency (Figure S3) (Kumar *et al.*, 2019; Kaur *et al.*,  
533 2019). Under P-deficiency, wheat decreases citrate levels, and increases expression of citrate  
534 synthase that could subsequently favor citrate exudation and this could be one important  
535 mechanism for higher Fe accumulation under P-deficiency (Table S10 and Figure 6A). On  
536 the other hand, Fe-deficient wheat roots tend to accumulate high levels of citrate with  
537 downregulation of citrate synthase transcript (TraesCS7A02G409800). Citrate being an  
538 Fe(III) chelator has been reported to play a relevant role in iron acquisition and xylem Fe  
539 transport (Durrett *et al.*, 2007; Valentinuzzi *et al.*, 2015). Our transcriptome changes support  
540 these metabolic changes. Indeed, P-deficiency showed an increase in transcript abundance of  
541 citrate synthase (TraesCS4A02G142400) that further supports the speculation of citrate  
542 exudation. Overexpression of citrate synthase has been shown to support plant growth under



543 P-deficiency by increasing citrate exudation (Anoop *et al.*, 2003). Furthermore, our OMICs  
544 study revealed that oxalate, fumarate and aconitate that accumulated specifically under P, Fe  
545 and dual deficiency respectively suggest distinct TCA cycle programming and energy  
546 balance (Igamberdiev and Kleczkowski, 2019). Our data further confirmed that plants  
547 accumulate/release of organic acids, mainly malate and citrate under P and Fe deficiencies to  
548 the rhizospheric regions for efficient mineralization (Kania *et al.*, 2003; Ligaba *et al.*, 2004;  
549 Wu, Liu, Riaz, Yan, & Jiang, 2019; Zhang *et al.*, 2015; Kania, Langlade, Martinoia, &  
550 Neumann, 2003; Mimmo *et al.*, 2014).). The cross-talk between P and Fe to regulate Fe  
551 uptake and transport has been also reported in dicots, such as *Arabidopsis*. For instance, P-  
552 deficiency was shown to induce expression of Fe homeostasis related genes like AtFRO2,  
553 AtIRT1 and ferritin genes (*Atfer1*) (Misson *et al.*, 2005; Y.-H. Wang, Garvin, & Kochian,  
554 2002;Bournier *et al.*, 2013). Likewise, Fe-deficiency can induce expression of P acquisition  
555 genes (Thimm *et al.*, 2004; Lucena *et al.*, 2019). These evidences along with our observations  
556 reinforce a strong link between the molecular interactions between P and Fe homeostasis in  
557 crops.

558

559 Identifying the specific signatures for the dual deficiency of –Fe and –P will provide  
560 an important link for homeostatic interaction between micro and macronutrient interaction.  
561 This study led to the identification of specific signatures at the transcript and metabolome  
562 level. In plants phenylpropanoid pathway (PPP) is the source of numerous phenylalanine  
563 derivatives involved in multiple development and physiological process, including lignin  
564 biosynthesis and cell wall development (Douglas, 1996; Boerjan *et al.*, 2003). The role of  
565 glycosyltransferases has been demonstrated to efficiently control the phenylpropanoid  
566 pathway (Aksamit-Stachurska *et al.*, 2008). The high expression of UGT transcripts during –  
567 Fe–P suggest reorganization of metabolic pathways that resulted in the identification of  
568 molecular signatures. Our MapMan analysis reinforces this, wherein high expression was  
569 observed for genes, especially encoding for simple phenols, lignin biosynthesis, isoflavonoids  
570 and carotenoids (Figure S2B). Multiple transcripts encoding for peroxidases, dirigent proteins  
571 and one laccase were also highly up-regulated in –Fe–P treatment (Table S2). This led to the  
572 speculation that dirigent-guided lignin deposition might be up-regulated in the roots during  
573 this combinatorial deficiency of Fe and P. Dirigent proteins in plants are well known to  
574 modulate cell wall metabolism during abiotic and biotic stress exposure (Paniagua *et al.*,  
575 2017). The high cell wall related activity in wheat roots could be correlated with the  
576 enhanced root biomass allocation (Figure 1F). Previously it was observed that lignin

577 biosynthesis could be linked with the excess Fe related responses to provide tolerance in rice  
578 (Stein *et al.*, 2019). The confirmatory role of lignification needs the functional attention in  
579 wheat to address this under dual deficiency. In addition to that Cytochrome P450, a key  
580 player in plant development, biotic and abiotic stresses (Narusaka *et al.*, 2004). These gene  
581 families are also considered as a scaffold-proteins for the lignin biosynthesis. Based on our  
582 analysis, including physiological and biochemical, increased lignification process in the roots  
583 during the –Fe–P condition could be one of the important biochemical hallmarks.

584

585 KEGG enrichment analysis reinforced our finding that genes encoding for glutathione  
586 metabolism were significantly enriched during –Fe–P treatment. Glutathione levels, its  
587 metabolism and activity have been correlated with the tolerance for –Fe (Zaharieva and  
588 Abadia, 2003; Bashir *et al.*, 2007; Kaur *et al.*, 2019). The increased burst of glutathione  
589 metabolism related genes provide evidence that graminaceous and Eucoids plants under –Fe–  
590 P show a very high glutathione related metabolism to compensate for the Fe-deficiency.  
591 Other components such as nitric oxide-mediated iron uptake response is also controlled by  
592 the supply of glutathione (Shanmugam *et al.*, 2015). The robust expression of glutathione  
593 related genes in –Fe–P condition suggest that the plants are undergoing through a strong  
594 redox process that is required to survive under combinatorial deficiency. Accumulation of  
595 glycine and serine has been implicated to negatively affect root length and nitrate uptake in  
596 *Brassica campestris*. Our data from this and previous study for contrasting levels of glycine  
597 and serine accumulation could explain the short roots during –Fe compared to +Fe+P, –P and  
598 –Fe –P (Kaur *et al.*, 2019). Glycine can induce ethylene guided inhibition of root elongation  
599 or it could be converted into amino butyric acid moieties during stress (Han *et al.*, 2018;  
600 Igamberdiev and Kleczkowski, 2019).

601

602 In contrast to during Fe-deficiency, we have observed an increase in the root growth  
603 and biomass under P-deficiency, which was maintained in response dual deficiency i.e. –Fe–  
604 P. Worth to mention that in the model plant, the opposite situation was observed. Short  
605 primary root under –P and recovery by –P–Fe (Bouain *et al.*, 2019). This indicate that dicots  
606 and monocots have evolved distinct genetic programs to respond to single and/or combined  
607 nutrient stress. While most of the studies pertaining to the nutrient interaction have been  
608 limited to the vegetative stage, there are limited studies on the molecular basis regulating co-  
609 occurring nutrients deficiency during the reproductive stage. Individual nutrient Fe or P stress  
610 in crops including wheat affects the overall physiological growth and development; and yield

611 components (Clark *et al.*, 1988; Carstensen *et al.*, 2018). Our study further confirmed that  
612 deficiency of either P or Fe largely impacts plant productivity, with Fe-deficiency causing  
613 more impact when compared to P. More importantly, we showed that Fe-deficiency induced  
614 morphological changes (i.e. spikelets and roots) that can be restored by removing P from the  
615 growth solution. For instance, we revealed that wheat spikelet components support the co-  
616 relation for the awn and rachis length to the grain quality (Figure 7C). The drastic reduction  
617 in the length of awn, rachis in turn affected the grain yields. In tobacco, it has been proven  
618 that inhibiting Fe uptake and transport can induce morphological abnormalities including  
619 infertility (Takahashi *et al.*, 2003). The inhibitory effect of –Fe was rescued by the dual  
620 deficiency of Fe and P, suggesting the removal of macronutrient such as P could minimize  
621 the impact of Fe-deficiency. Also, it is clear that understanding how plants integrate P and Fe  
622 signals to controls plant development at reproductive stage is at it is early stage. Our data  
623 opens new research avenues to uncover the molecular basis of P and Fe signalling crosstalk  
624 in plants, and will lead to designing strategies to develop wheat cultivars with an improved  
625 Fe and P use efficiency.

626

## 627 **ACKNOWLEDGEMENTS**

628 The authors thank Executive Director, NABI for facilities and support. This work was funded  
629 by the NABI-CORE grant to AKP. GK and VS acknowledge NABI-SRF Fellowships.  
630 Technical help from Jagdeep Singh for the GC-MS analysis is highly appreciated. DBT-  
631 eLibrary Consortium (DeLCON) is acknowledged for providing timely support and access to  
632 e-resources for this work. The wheat genome resources developed by International Wheat  
633 Genome Sequencing Consortium are highly appreciated.

634

## 635 **REFERENCES**

636 **Abadia J, Vazquez S, Rellan-Alvarez R, El-Jendoubi H, Abadia A, Alvarez-Fernandez**  
637 **A, Lopez-Millan AF.** 2011. Towards a knowledge-based correction of iron chlorosis. *Plant*  
638 *physiology and biochemistry* □: PPB **49**, 471–482.  
639 **Aggarwal S, Kumar A, Bhati KK, Kaur G, Shukla V, Tiwari S, Pandey AK.** 2018.  
640 RNAi-Mediated Downregulation of Inositol Pentakisphosphate Kinase (IPK1) in Wheat  
641 Grains Decreases Phytic Acid Levels and Increases Fe and Zn Accumulation. *Frontiers in*  
642 *plant science* **9**, 259.  
643 **Aksamit-Stachurska A, Korobczak-Sosna A, Kulma A, Szopa J.** 2008.  
644 Glycosyltransferase efficiently controls phenylpropanoid pathway. *BMC Biotechnology* **8**,

- 645 25.
- 646 **Anoop VM, Basu U, McCammon MT, McAlister-Henn L, Taylor GJ.** 2003. Modulation  
647 of citrate metabolism alters aluminum tolerance in yeast and transgenic canola  
648 overexpressing a mitochondrial citrate synthase. *Plant physiology* **132**, 2205–2217.
- 649 **Bashir K, Nagasaka S, Itai RN, Kobayashi T, Takahashi M, Nakanishi H, Mori S,**  
650 **Nishizawa NK.** 2007. Expression and enzyme activity of glutathione reductase is  
651 upregulated by Fe-deficiency in graminaceous plants. *Plant molecular biology* **65**, 277–284.
- 652 **Bhati KK, Alok A, Kumar A, Kaur J, Tiwari S, Pandey AK.** 2016. Silencing of ABCC13  
653 transporter in wheat reveals its involvement in grain development, phytic acid accumulation  
654 and lateral root formation. *Journal of experimental botany* **67**, 4379–4389.
- 655 **Boerjan W, Ralph J, Baucher M.** 2003. Lignin biosynthesis. *Annual review of plant*  
656 *biology* **54**, 519–546.
- 657 **Bouain N, Doumas P, Rouached H.** 2016. Recent Advances in Understanding the  
658 Molecular Mechanisms Regulating the Root System Response to Phosphate Deficiency in  
659 *Arabidopsis*. *Current genomics* **17**, 304–308.
- 660 **Bouain N, Shahzad Z, Rouached A, Khan GA, Berthomieu P, Abdelly C, Poirier Y,**  
661 **Rouached H.** 2014. Phosphate and zinc transport and signalling in plants: toward a better  
662 understanding of their homeostasis interaction. *Journal of Experimental Botany* **65**, 5725–  
663 5741.
- 664 **Cai H, Xie W, Zhu T, Lian X.** 2012. Transcriptome response to phosphorus starvation in  
665 rice. *Acta Physiologiae Plantarum* **34**, 327–341.
- 666 **Carstensen A, Herdean A, Schmidt SB, Sharma A, Spetea C, Pribil M, Husted S.** 2018.  
667 The Impacts of Phosphorus Deficiency on the Photosynthetic Electron Transport Chain. *Plant*  
668 *Physiology* **177**, 271 LP – 284.
- 669 **Chutia R, Abel S, Ziegler J.** 2019. Iron and Phosphate Deficiency Regulators Concertedly  
670 Control Coumarin Profiles in *Arabidopsis thaliana* Roots During Iron, Phosphate, and  
671 Combined Deficiencies . *Frontiers in Plant Science* **10**, 113.
- 672 **Clark RB, Williams EP, Ross WM, Herron GM, Witt MD.** 1988. Effect of iron deficiency  
673 chlorosis on growth and yield component traits of sorghum. *Journal of Plant Nutrition* **11**,  
674 747–754.
- 675 **Curie C, Panaviene Z, Loulergue C, Dellaporta SL, Briat J-F, Walker EL.** 2001. Maize  
676 yellow stripe1 encodes a membrane protein directly involved in Fe(III) uptake. *Nature* **409**,  
677 346–349.
- 678 **Dalton CC, Iqbal K, Turner DA.** 1983. Iron phosphate precipitation in Murashige and

- 679 Skoog media. *Physiologia Plantarum* **57**, 472–476.
- 680 **Douglas CJ**. 1996. Phenylpropanoid metabolism and lignin biosynthesis: from weeds to  
681 trees. *Trends in Plant Science* **1**, 171–178.
- 682 **Durrett TP, Gassmann W, Rogers EE**. 2007. The FRD3-Mediated Efflux of Citrate into  
683 the Root Vasculature Is Necessary for Efficient Iron Translocation. *Plant Physiology* **144**,  
684 197 LP – 205.
- 685 **Han R, Khalid M, Juan J, Huang D**. 2018. Exogenous glycine inhibits root elongation and  
686 reduces nitrate-N uptake in pak choi (*Brassica campestris* ssp. *Chinensis* L.). *PLOS ONE* **13**,  
687 e0204488.
- 688 **Heuer S, Gaxiola R, Schilling R, Herrera-Estrella L, López-Arredondo D, Wissuwa M,**  
689 **Delhaize E, Rouached H**. 2017. Improving phosphorus use efficiency: a complex trait with  
690 emerging opportunities. *The Plant Journal* **90**, 868–885.
- 691 **Hirsch J, Marin E, Floriani M, Chiarenza S, Richaud P, Nussaume L, Thibaud MC**.  
692 2006. Phosphate deficiency promotes modification of iron distribution in Arabidopsis plants.  
693 *Biochimie* **88**, 1767–1771.
- 694 **Igamberdiev AU, Kleczkowski LA**. 2019. Thermodynamic buffering, stable non-  
695 equilibrium and establishment of the computable structure of plant metabolism. *Progress in*  
696 *Biophysics and Molecular Biology* **146**, 23–36.
- 697 **Inoue H, Kobayashi T, Nozoye T, Takahashi M, Kakei Y, Suzuki K, Nakazono M,**  
698 **Nakanishi H, Mori S, Nishizawa NK**. 2009. Rice OsYSL15 is an iron-regulated iron(III)-  
699 deoxymugineic acid transporter expressed in the roots and is essential for iron uptake in early  
700 growth of the seedlings. *The Journal of biological chemistry* **284**, 3470–3479.
- 701 **Ivanov R, Brumbarova T, Bauer P**. 2012. Fitting into the Harsh Reality: Regulation of  
702 Iron-deficiency Responses in Dicotyledonous Plants. *Molecular Plant* **5**, 27–42.
- 703 **Kania A, Langlade N, Martinoia E, Neumann G**. 2003. Phosphorus deficiency-induced  
704 modifications in citrate catabolism and in cytosolic pH as related to citrate exudation in  
705 cluster roots. *Plant and Soil* **248**, 117–127.
- 706 **Kaur G, Shukla V, Kumar A, et al**. 2019. Integrative analysis of hexaploid wheat roots  
707 identifies signature components during iron starvation. *Journal of experimental botany* **70**,  
708 6141–6161.
- 709 **Kobayashi T, Nishizawa NK**. 2012. Iron uptake, translocation, and regulation in higher  
710 plants. *Annual review of plant biology* **63**, 131–152.
- 711 **Kumar A, Kaur G, Goel P, Bhati KK, Kaur M, Shukla V, Pandey AK**. 2019. Genome-  
712 wide analysis of oligopeptide transporters and detailed characterization of yellow stripe

- 713 transporter genes in hexaploid wheat. *Functional & integrative genomics* **19**, 75–90.
- 714 **Lee S, Chiecko JC, Kim SA, Walker EL, Lee Y, Guerinot M Lou, An G.** 2009.
- 715 Disruption of *OsYSL15*; Leads to Iron Inefficiency in Rice Plants.
- 716 *Plant Physiology* **150**, 786 LP – 800.
- 717 **Ligaba A, Shen H, Shibata K, Yamamoto Y, Tanakamaru S, Matsumoto H.** 2004. The
- 718 role of phosphorus in aluminium-induced citrate and malate exudation from rape (*Brassica*
- 719 *napus*). *Physiologia plantarum* **120**, 575–584.
- 720 **Livak KJ, Schmittgen TD.** 2001. Analysis of relative gene expression data using real-time
- 721 quantitative PCR and the 2<sup>-</sup>( $\Delta\Delta C(T)$ ) Method. *Methods (San Diego, Calif.)* **25**, 402–
- 722 408.
- 723 **Love MI, Huber W, Anders S.** 2014. Moderated estimation of fold change and dispersion
- 724 for RNA-seq data with DESeq2. *Genome Biology* **15**, 550.
- 725 **Lucena C, Porras R, García MJ, Alcántara E, Pérez-Vicente R, Zamarreño ÁM,**
- 726 **Bacaicoa E, García-Mina JM, Smith AP, Romera FJ.** 2019. Ethylene and Phloem Signals
- 727 Are Involved in the Regulation of Responses to Fe and P Deficiencies in Roots of Strategy I
- 728 Plants . *Frontiers in Plant Science* **10**, 1237.
- 729 **Ma JF, Ling H-Q.** 2009. Iron for plants and humans. *Plant and Soil* **325**, 1–3.
- 730 **Marschner H.** 1995. 9 - Functions of Mineral Nutrients: Micronutrients. In: Marschner
- 731 HBT-MN of HP (Second E, ed. London: Academic Press, 313–404.
- 732 **Mimmo T, Del Buono D, Terzano R, Tomasi N, Vigani G, Crecchio C, Pinton R, Zocchi**
- 733 **G, Cesco S.** 2014. Rhizospheric organic compounds in the soil–microorganism–plant system:
- 734 their role in iron availability. *European Journal of Soil Science* **65**, 629–642.
- 735 **Misson J, Raghothama KG, Jain A, et al.** 2005. A genome-wide transcriptional analysis
- 736 using *Arabidopsis thaliana* Affymetrix gene chips determined plant responses to phosphate
- 737 deprivation. *Proceedings of the National Academy of Sciences of the United States of*
- 738 *America* **102**, 11934–11939.
- 739 **Mollier A, Pellerin S.** 1999. Maize root system growth and development as influenced by
- 740 phosphorus deficiency. *Journal of Experimental Botany* **50**, 487–497.
- 741 **Mora-Macías J, Ojeda-Rivera JO, Gutiérrez-Alanís D, Yong-Villalobos L, Oropeza-**
- 742 **Aburto A, Raya-González J, Jiménez-Domínguez G, Chávez-Calvillo G, Rellán-Álvarez**
- 743 **R, Herrera-Estrella L.** 2017. Malate-dependent Fe accumulation is a critical checkpoint in
- 744 the root developmental response to low phosphate. *Proceedings of the National Academy of*
- 745 *Sciences* **114**, E3563 LP-E3572.
- 746 **Morrissey J, Guerinot M Lou.** 2009. Iron uptake and transport in plants: the good, the bad,

- 747 and the ionome. *Chemical reviews* **109**, 4553–4567.
- 748 **Murata Y, Ma JF, Yamaji N, Ueno D, Nomoto K, Iwashita T.** 2006. A specific transporter  
749 for iron(III)–phytosiderophore in barley roots. *The Plant Journal* **46**, 563–572.
- 750 **Narayanan, A. Reddy K.** 1982. Effect of phosphorus deficiency on the form of plant root  
751 system. Slough, UK: Commonwealth Agricultural Bureaux, c1982., 412–417.
- 752 **Narusaka Y, Narusaka M, Seki M, Umezawa T, Ishida J, Nakajima M, Enju A,**  
753 **Shinozaki K.** 2004. Crosstalk in the responses to abiotic and biotic stresses in Arabidopsis:  
754 analysis of gene expression in cytochrome P450 gene superfamily by cDNA microarray.  
755 *Plant molecular biology* **55**, 327–342.
- 756 **Naumann C, Müller J, Sakhonwasee S, Wiegand A, Hause G, Heisters M,**  
757 **Bürstenbinder K, Abel S.** 2019. The Local Phosphate Deficiency Response Activates  
758 Endoplasmic Reticulum Stress-Dependent Autophagy. *Plant Physiology* **179**, 460 LP – 476.
- 759 **Nozoye T, Nagasaka S, Kobayashi T, Takahashi M, Sato Y, Sato Y, Uozumi N,**  
760 **Nakanishi H, Nishizawa NK.** 2011. Phytosiderophore efflux transporters are crucial for iron  
761 acquisition in graminaceous plants. *Journal of Biological Chemistry* **286**, 5446–5454.
- 762 **Oono Y, Kobayashi F, Kawahara Y, Yazawa T, Handa H, Itoh T, Matsumoto T.** 2013.  
763 Characterisation of the wheat (*Triticum aestivum* L.) transcriptome by de novo assembly for  
764 the discovery of phosphate starvation-responsive genes: gene expression in Pi-stressed wheat.  
765 *BMC genomics* **14**, 77.
- 766 **Paniagua C, Bilkova A, Jackson P, et al.** 2017. Dirigent proteins in plants: modulating cell  
767 wall metabolism during abiotic and biotic stress exposure. *Journal of experimental botany* **68**,  
768 3287–3301.
- 769 **Quanbeck S, Brachova L, Campbell A, et al.** 2012. Metabolomics as a Hypothesis-  
770 Generating Functional Genomics Tool for the Annotation of Arabidopsis thaliana Genes of  
771 “Unknown Function” . *Frontiers in Plant Science* **3**, 15.
- 772 **Raghothama KG.** 1999. PHOSPHATE ACQUISITION. *Annual Review of Plant*  
773 *Physiology and Plant Molecular Biology* **50**, 665–693.
- 774 **Ritchie ME, Phipson B, Wu D, Hu Y, Law CW, Shi W, Smyth GK.** 2015. limma powers  
775 differential expression analyses for RNA-sequencing and microarray studies. *Nucleic acids*  
776 *research* **43**, e47–e47.
- 777 **Römheld V.** 1991. The role of phytosiderophores in acquisition of iron and other  
778 micronutrients in graminaceous species: An ecological approach. *Plant and Soil* **130**, 127–  
779 134.
- 780 **Römheld V, Marschner H.** 1986. Evidence for a specific uptake system for iron

- 781 phytosiderophores in roots of grasses. *Plant physiology* **80**, 175–180.
- 782 **Rouached H, Arpat AB, Poirier Y.** 2010. Regulation of phosphate starvation responses in  
783 plants: signaling players and cross-talks. *Molecular plant* **3**, 288–299.
- 784 **Schwarz B, Azodi CB, Shiu S-H, Bauer P.** 2020. Putative cis-Regulatory Elements Predict  
785 Iron Deficiency Responses in Arabidopsis Roots. *Plant Physiology* **182**, 1420 LP – 1439.
- 786 **Secco D, Bouain N, Rouached A, Prom-U-Thai C, Hanin M, Pandey AK, Rouached H.**  
787 2017. Phosphate, phytate and phytases in plants: from fundamental knowledge gained in  
788 Arabidopsis to potential biotechnological applications in wheat. *Critical reviews in*  
789 *biotechnology* **37**, 898–910.
- 790 **Secco D, Jabnune M, Walker H, Shou H, Wu P, Poirier Y, Whelan J.** 2013. Spatio-  
791 temporal transcript profiling of rice roots and shoots in response to phosphate starvation and  
792 recovery. *The Plant cell* **25**, 4285–4304.
- 793 **Shanmugam V, Wang Y-W, Tsednee M, Karunakaran K, Yeh K-C.** 2015. Glutathione  
794 plays an essential role in nitric oxide-mediated iron-deficiency signaling and iron-deficiency  
795 tolerance in Arabidopsis. *The Plant Journal* **84**, 464–477.
- 796 **Shimizu A, Yanagihara S, Kawasaki S, Ikehashi H.** 2004. Phosphorus deficiency-induced  
797 root elongation and its QTL in rice (*Oryza sativa* L.). *Theoretical and Applied Genetics* **109**,  
798 1361–1368.
- 799 **Soneson C, Love MI, Robinson MD.** 2015. Differential analyses for RNA-seq: transcript-  
800 level estimates improve gene-level inferences. *F1000Research* **4**, 1521.
- 801 **Stein RJ, Duarte GL, Scheunemann L, Spohr MG, de Araújo Júnior AT,**  
802 **Ricachenevsky FK, Rosa LMG, Zanchin NIT, Santos RP dos, Fett JP.** 2019. Genotype  
803 variation in rice (*Oryza sativa* L.) tolerance to Fe toxicity might be linked to root cell wall  
804 lignification. *Frontiers in Plant Science* **10**, 1–20.
- 805 **Svistoonoff S, Creff A, Reymond M, Sigoillot-Claude C, Ricaud L, Blanchet A,**  
806 **Nussaume L, Desnos T.** 2007. Root tip contact with low-phosphate media reprograms plant  
807 root architecture. *Nature Genetics* **39**, 792–796.
- 808 **Takagi S.** 1976. Naturally occurring iron-chelating compounds in oat- and rice-root  
809 washings. *Soil Science and Plant Nutrition* **22**, 423–433.
- 810 **Takahashi M, Terada Y, Nakai I, Nakanishi H, Yoshimura E, Mori S, Nishizawa NK.**  
811 2003. Role of nicotianamine in the intracellular delivery of metals and plant reproductive  
812 development. *The Plant cell* **15**, 1263–1280.
- 813 **Thimm O, Bläsing O, Gibon Y, Nagel A, Meyer S, Krüger P, Selbig J, Müller LA, Rhee**  
814 **SY, Stitt M.** 2004. mapman: a user-driven tool to display genomics data sets onto diagrams



815 of metabolic pathways and other biological processes. *The Plant Journal* **37**, 914–939.

816 **Valentinuzzi F, Pii Y, Vigani G, Lehmann M, Cesco S, Mimmo T.** 2015. Phosphorus and  
817 iron deficiencies induce a metabolic reprogramming and affect the exudation traits of the  
818 woody plant *Fragaria×ananassa*. *Journal of Experimental Botany* **66**, 6483–6495.

819 **Wang Y-H, Garvin DF, Kochian L V.** 2002. Rapid induction of regulatory and transporter  
820 genes in response to phosphorus, potassium, and iron deficiencies in tomato roots. Evidence  
821 for cross talk and root/rhizosphere-mediated signals. *Plant physiology* **130**, 1361–1370.

822 **Ward JT, Lahner B, Yakubova E, Salt DE, Raghothama KG.** 2008a. The effect of iron  
823 on the primary root elongation of *Arabidopsis* during phosphate deficiency. *Plant Physiology*  
824 **147**, 1181–1191.

825 **Ward JT, Lahner B, Yakubova E, Salt DE, Raghothama KG.** 2008b. The effect of iron  
826 on the primary root elongation of *Arabidopsis* during phosphate deficiency. *Plant physiology*  
827 **147**, 1181–1191.

828 **Wickham H.** 2017. Book review: *ggplot2 – Elegant Graphics for Data Analysis* (2nd  
829 Edition). , 2–5.

830 **Wu X, Liu G, Riaz M, Yan L, Jiang C.** 2019. Metabolic changes in roots of trifoliate  
831 orange [*Poncirus trifoliate* (L.) Raf.] as induced by different treatments of boron deficiency  
832 and resupply. *Plant and Soil* **434**, 217–229.

833 **Xie X, Hu W, Fan X, Chen H, Tang M.** 2019. Interactions Between Phosphorus, Zinc, and  
834 Iron Homeostasis in Nonmycorrhizal and Mycorrhizal Plants. *Frontiers in plant science* **10**,  
835 1172.

836 **Zaharieva TB, Abadia J.** 2003. Iron deficiency enhances the levels of ascorbate,  
837 glutathione, and related enzymes in sugar beet roots. *Protoplasma* **221**, 269–275.

838 **Zhang F, Sun Y, Pei W, et al.** 2015. Involvement of *OsPht1;4* in phosphate acquisition and  
839 mobilization facilitates embryo development in rice. *The Plant journal*: for cell and  
840 molecular biology **82**, 556–569.

841 **Zhou Y, Neuhäuser B, Neumann G, Ludewig U.** 2020. *LaALMT1* mediates malate release  
842 from phosphorus-deficient white lupin root tips and metal root to shoot translocation. *Plant,*  
843 *Cell & Environment* **n/a**.

844 **Zhu A, Ibrahim JG, Love MI.** 2018. Heavy-tailed prior distributions for sequence count  
845 data: removing the noise and preserving large differences. *Bioinformatics* **35**, 2084–2092.

846

847

848

849 **Table 1:** Percentage distribution of top twenty putative frequent cis-regulatory elements  
 850 (freq-pCREs) analyzed in the RNAseq data (-Fe+P, +Fe-P, -Fe-P) and in shortlisted genes  
 851 involved during Fe-starvation response (FSR-93 genes) and phosphate starvation response  
 852 (PSR-50 genes). Detailed list of freq-pCREs analysis is shown in Table S11.

| pCREs<br>(motifs) | Percentage distribution of freq-pCREs in given<br>condition |       |       |              |       | Top TF family |
|-------------------|-------------------------------------------------------------|-------|-------|--------------|-------|---------------|
|                   | -Fe+P                                                       | +Fe-P | -Fe-P | FSR          | PSR   |               |
| CATGCA            | 63.82                                                       | 62.22 | 65.79 | <b>80.65</b> | 80.00 | ABI3VP1       |
| ATGCAT            | 64.20                                                       | 64.68 | 65.72 | <b>76.34</b> | 70.00 | B3            |
| GCATGA            | 46.09                                                       | 44.41 | 46.91 | <b>68.82</b> | 60.00 | B3            |
| ATATAT            | 65.87                                                       | 66.42 | 67.52 | <b>66.67</b> | 70.00 | ARID          |
| AAACTA            | 49.29                                                       | 50.49 | 50.65 | <b>59.14</b> | 66.00 | ARID          |
| TATGCA            | 45.24                                                       | 46.50 | 47.05 | <b>58.06</b> | 50.00 | ABI3VP1       |
| AATTAA            | 54.52                                                       | 55.30 | 54.21 | <b>54.84</b> | 56.00 | Homeobox      |
| AAAGTA            | 42.53                                                       | 43.28 | 41.33 | <b>53.76</b> | 32.00 | C2C2-Dof      |
| ACTAGT            | 43.24                                                       | 41.80 | 41.73 | <b>50.54</b> | 32.00 | bHLH          |
| AATATG            | 49.27                                                       | 49.64 | 48.02 | <b>49.46</b> | 52.00 | G2-like       |
| CACACG            | 43.24                                                       | 42.03 | 42.95 | <b>49.46</b> | 28.00 | BZR           |
| TAATTA            | 48.02                                                       | 50.36 | 49.60 | <b>47.31</b> | 54.00 | Homeobox      |
| AGCATG            | 44.21                                                       | 44.65 | 45.07 | <b>46.24</b> | 52.00 | B3            |
| AGGCAT            | 33.58                                                       | 34.35 | 33.71 | <b>45.16</b> | 38.00 | G2-like       |
| AATTGC            | 37.12                                                       | 39.23 | 36.29 | <b>44.09</b> | 26.00 | Homeobox      |
| CCGGCC            | 50.82                                                       | 49.48 | 50.40 | <b>44.09</b> | 58.00 | GeBP          |
| CGGCCG            | 48.59                                                       | 47.03 | 46.15 | <b>44.09</b> | 54.00 | GeBP          |
| AGTCAA            | 38.93                                                       | 38.39 | 40.00 | <b>41.94</b> | 58.00 | WRKY          |
| CGTGCC            | 35.68                                                       | 33.08 | 34.78 | <b>41.94</b> | 30.00 | bHLH          |
| ACGAAA            | 37.00                                                       | 36.46 | 37.16 | <b>40.86</b> | 28.00 | NLP           |

853

854

855

856

857

858

859

860

861

862

863

864

865

866 **LEGENDS FOR FIGURES:**

867 **Figure 1: Effect of Fe and P on the growth of roots and shoots of wheat seedlings**  
868 **exposed to the mentioned condition for the period of 5, 10 and 20 days.** (A) Experimental  
869 setup and the overall growth of wheat seedlings in the given conditions. Morphology of the  
870 wheat seedlings subjected to mentioned stress condition (+Fe+P, +Fe-P, -Fe+P and -Fe-P).  
871 Pictures were taken after 5, 10, 20 days. (B) Representative root phenotype of wheat roots  
872 after 20 days of treatment. (C) Primary root length of wheat seedlings under treated  
873 conditions. (D) Total number of 1<sup>st</sup> order lateral roots and (E) Average total length of lateral  
874 roots (n=8). (F) Fresh biomass of the root and shoots of the seedlings (S-shoots; R-roots). #  
875 and \* indicates significant difference at p<0.05 and p<0.01 respectively.

876 **Figure 2: Effect of Fe and P interaction on metal accumulation and its mobilization.** (A)  
877 Phosphate uptake in the seedlings of wheat under different regimes of Fe and P. (B) Metal  
878 concentration in roots and shoots of wheat seedling subjected to -Fe, -Pi and -Fe-Pi stress.  
879 (C) Phenotype of wheat root seedlings during the combinatorial effects of Fe and P as  
880 observed by the Perl's Stain for iron plaque (blue plaques). (D) Estimation of the  
881 phytosiderophore release by the wheat roots under the mentioned condition. # and \* indicates  
882 significant difference at p<0.05 and p<0.01 respectively.

883 **Figure 3: Transcriptome analysis of wheat roots grown under single (-P, -Fe) and dual**  
884 **(-Fe-P) conditions.** (A) Genes differentially expressed in response to different deficiency  
885 conditions (Dual, -Fe-P; P deficiency, +Fe-P; Fe deficiency, -Fe+P) w.r.t. Control wheat  
886 roots. (B) Venn diagram representing the number of unique as well as common differentially  
887 regulated genes for the three conditions w.r.t. Control. (C) Analysis of highest differentially  
888 responsive genes during -Fe-P condition. Increasing intensities of red and blue colors  
889 represent up- and downregulation, as depicted by the color scale.

890 **Figure 4: Fe deficiency responsive transcripts affected by different regimes of P.** (A)  
891 Heatmap analysis of 60 genes involved in the auxin biosynthesis and response during -P, -Fe  
892 and -Fe -P. (B) Analysis of PSR related genes during Fe deficiency (-Fe) and combinatorial  
893 deficiency -Fe-P. In total 50 PSR related DEGs belonging to the category of uptake,  
894 transport and regulation were used for the analysis. (C) Effect of additional P deficiency on  
895 Fe responsive genes. Inner circle of the sunburst graph represents transcripts up- and  
896 downregulated under Fe stress while outer concentric circle represents the distribution of said  
897 these genes upon dual combined stress. (UP: upregulated; Down: Downregulated; Dual\_no:  
898 not DE under -Fe-P). (D) Heatmap analysis of 93 iron responsive DEGs involved in Fe  
899 uptake, mobilization and regulation (identified from Kaur et al., 2019) during -P and -Fe -P.

900 **Figure 5: Mapman and KEGG Pathway enrichment analysis.** (A) Detailed analysis of  
901 DEGs for UDP glycosyltransferases, cytochrome P450 and Glutathione-S-transferases. Log<sub>2</sub>  
902 fold change values of the DEGs were imported into MapMan. Red and blue bins represent  
903 up-regulation and down-regulation as shown by the scale. (B) Significantly enriched  
904 pathways (qvalue< 0.05) for +Fe -P (P-deficiency) and -Fe -P (dual) deficiency. X-axis  
905 depicts the rich-factor, i.e., the ratio of perturbed genes in a pathway w.r.t. the total number of  
906 genes involved in the respective pathway, y-axis represents the enriched pathway names,  
907 bubble sizes depict the number of genes altered in respective pathways, and increasing  
908 intensity of blue color represents increasing significance (decreasing q-value).

909 **Figure 6: Overview of the changes in metabolome in roots of wheat seedlings subjected**  
910 **to different growth regimes of Fe and P.** (A) Heatmap distribution of the different  
911 metabolome (GC-MS) analysis in the respective replicates of each conditions for of the  
912 metabolites. Individual metabolites are expressed in terms of concentrations ( $\mu\text{g}/\text{mg}$ , fresh  
913 weight). Data are means  $\pm$ SD of n=3 experiments. Metabolites are sorted according to their  
914 classes specifically, Sugars, general acids, amino acids, sugar conjugates, fatty acids and  
915 polyols. (B) Quantitative plot for the metabolite concentrations ( $\mu\text{g}/\text{mg}$  FW) for response  
916 specific to -Fe -P and response common in -Fe and -Fe-P. Different symbols indicate  
917 significant differences between the conditions as determined by Fisher's LSD ( $p < 0.05$ ). +Fe  
918 +P, control; -Fe +P, Fe deficiency; +Fe -P, P deficiency; -Fe -P, Fe and P deficiency. 'a'  
919 represent significant difference against control, '#' represent significant difference against Fe  
920 deficiency and '@' represent significant difference against P deficiency. Red and green bins  
921 represent up-regulation and down-regulation with Log<sub>2</sub> fold change values as shown by the  
922 scale.

923 **Figure 7: Phenotype of wheat grown under different Fe/P concentrations.** (A)  
924 Phenotypic representation of wheat plants subjected to multiple treatments (after 45 days of  
925 treatments). (B) Spike length for the respective treatments (n=5). (C) Phenotypic  
926 characteristics of different tissue of the spike (glumes, rachis, awn and seeds). (D) Averaged  
927 weight of mentioned tissue normalized to per spike. The represented values are calculated  
928 from biological replicates with 5 replicates (spikes) for each tissue.

929

## 930 **LEGEND FOR SUPPLEMENTARY DATA**

931

932 **Figure S1: Expression correlation within replicates and across distinct conditions from**  
933 **RNAseq data.** A) Principal component analysis (PCA) and B) Cluster heatmap analysis of

934 genes across different deficiency conditions (+Fe-P, -Fe+P and -Fe-P) and control (+Fe+P)  
935 for a period of 20 days in wheat roots. Genes with highest variation across these four  
936 conditions were used for generating the heatmap using pheatmap package. The change from  
937 blue to red color in the color scale depicts increasing gene expression.

938 **Figure S2: MapMan based functional enrichment analysis.** A) Hormone biosynthesis and  
939 regulation related perturbed genes in -P (left pane) and -Fe-P (right pane) represented as bins  
940 for the respective hormones. B) Secondary metabolism related genes altered in -Fe-P  
941 condition. Log<sub>2</sub>FC values for the respective conditions w.r.t. control was used as input for  
942 MapMan, Red and blue colored bins represent up and downregulation of genes, as depicted  
943 by the scale.

944 **Figure S3: qRT-PCR analysis of genes involved in Fe uptake/mobilization.** Total of 2  $\mu$ g  
945 of RNA was used for cDNA synthesis and qRT-PCR was performed using gene specific  
946 primers (Table S1). C<sub>t</sub> values were normalized against wheat *ARF1* as an internal control.

947 **Figure S4: MapMan metabolism overview for the DEGs in P and Fe deficiency.**  
948 Metabolism overview demonstrating differentially expressed transcripts involved in different  
949 functional categories, under A) -P and B) -Fe-P deficiency samples w.r.t. control wheat  
950 roots. Log<sub>2</sub>FC values for the respective conditions w.r.t. control was used as input for  
951 MapMan, red and blue colored bins represent up and downregulation of genes.

952 **Figure S5: MapMan visualization depicting the differentially expressed transcription**  
953 **factors families (TFs) for -P (top) and -Fe-P (bottom) conditions w.r.t. Control wheat**  
954 **roots.** The red and blue coloured bins represent up and down-regulated transcripts. Numbers  
955 in the scale represent fold changes in expression levels expressed as Log<sub>2</sub>.

956

957 **Table S1: Primers used in the current study.**

958 **Table S2: DEGs in response to Fe and P deficiency in wheat roots.** List of upregulated  
959 genes and downregulated genes (multiple sheets) in respective conditions. Tables enlists  
960 genes perturbed during -P (upregulated and downregulated) and -Fe-P (upregulated and  
961 down regulated) with reference to the control samples. Our older RNAseq (Kaur et. al., 2019,  
962 BioProjectID-PRJNA529036) analysis was also repeated using Kallisto-DESeq2 pipeline,  
963 and thus -Fe (up-regulated and downregulated) perturbed genes are also listed in different  
964 sheets. DEGs were annotated with information like gene description, rice ortholog, ortholog  
965 based gene definition, KEGG Orthology, Pathways and Pfam domains, which were obtained

966 through KOBAS 3.0 stand-alone tool, using *Oryza sativa* RAP-DB as reference and also  
967 using wheat RefSeq v1.1.

968 **Table S3: Unique genes within DEGs in response to Fe and/or P deficiency w.r.t. control**  
969 **in wheat roots.** List of unique DEGs expressed during each respective condition, -P, -Fe and  
970 -Fe-P (upregulated and down regulated).

971 **Table S4: Common genes among the DEGs in response to Fe and/or P deficiency w.r.t.**  
972 **control in wheat roots, as displayed in the Venn diagram.** List of common genes regulated  
973 by -P and -Fe-P (Sheet1), -Fe and -Fe-P (Sheet2), -Fe and -P (Sheet3). Genes regulated  
974 commonly either in same or opposite direction have been included. (NC: No significant  
975 change in expression)

976 **Table S5: List of DEGs encoding for different transcription factors those are**  
977 **differentially up- and downregulated.** MapMan was used to identify TFs and categorize  
978 them into TF families. Table gives logFC value for deficiency vs control under -P, -Fe and -  
979 Fe-P conditions. A gradient of red and green is used for upregulated and downregulated TFs  
980 respectively.

981 **Table S6: List of Auxin homeostasis related genes.** Genes involved in Auxin biosynthesis  
982 were shortlisted using orthologs from rice obtained using KOBAS annotation tool, while  
983 other genes involved in degradation, signal transduction and auxin responsive genes were  
984 identified using MapMan.

985 **Table S7: List of Phosphate deficiency responsive and Fe stress responsive genes.** Genes  
986 central to the uptake, transport and regulation for P and Fe under the respective stresses were  
987 shortlisted.

988 **Table S8: Common and contrasting genes specific for -P and -Fe-P.** Lists for 39 genes  
989 upregulated in both -P and -Fe-P; 96 genes downregulated in both -P and -Fe-P; 146 genes  
990 that are oppositely regulated in -P and -Fe-P.

991 **Table S9: Common and contrasting genes specific for -Fe and -Fe-P.** Lists Fe altered  
992 genes that were still differentially responsive in additional absence of P, either showing the  
993 same (410 genes; 356 upregulated in both conditions, 54 downregulated in both) or  
994 contrasting pattern of expression (200 genes). Also listed are 84 genes commonly regulated  
995 in all 3 conditions.

996 **Table S10: GC-MS analysis of wheat roots subjected to different regimes of Fe and P.** Each  
997 metabolite is represented with concentrations in three independent replicate manners. For  
998 concentration calculation, individual metabolite area was normalized to sample weight and  
999 area of internal control (sorbitol). Metabolites with no detectable area in any of the conditions

1000 were considered to be the metabolite with minimum area. Delta method approximation was  
1001 used to calculate standard errors (se) of log-ratio,  $se \log\text{-ratio} = 1/\ln 2 \sqrt{[(SET/T)^2 + (SEC$   
1002  $/C)^2]}$ , where SET and SEC are standard errors of average +Fe -P/-P +Fe/-Fe -P and +Fe +P  
1003 metabolite abundances, respectively. Metabolites with significant (p-value <0.05) differential  
1004 abundance were plotted.

1005 **Table S11: Percentage distribution of frequent putative cis-regulatory elements (freq-**  
1006 **pCREs) analysed in RNASeq data.** DEGs from the three deficiency conditions were  
1007 selected, their promoters were searched for the presence of the 115 freq-pCREs enriched in  
1008 Fe GS clusters (Schwarz et al., 2020). Percentage distribution was also analysed for FSR and  
1009 PSR genes. For control sample, three sets of 100 genes with no DE under -Fe condition were  
1010 randomly selected and analyzed. TF family for respective motifs were obtained from  
1011 Schwarz et al., 2020.

1012 **Table S12: Percentage distribution of PHR1 binding site (P1BS) motifs in the promoter**  
1013 **region of transcripts DE in RNASeq data and specifically in the genes involved in FSR,**  
1014 **PSR genes (Sheet 1).** PSR and FSR genes followed by the number of P1BS motifs found in  
1015 each gene's promoter region (Sheet 2 and 3).

1016

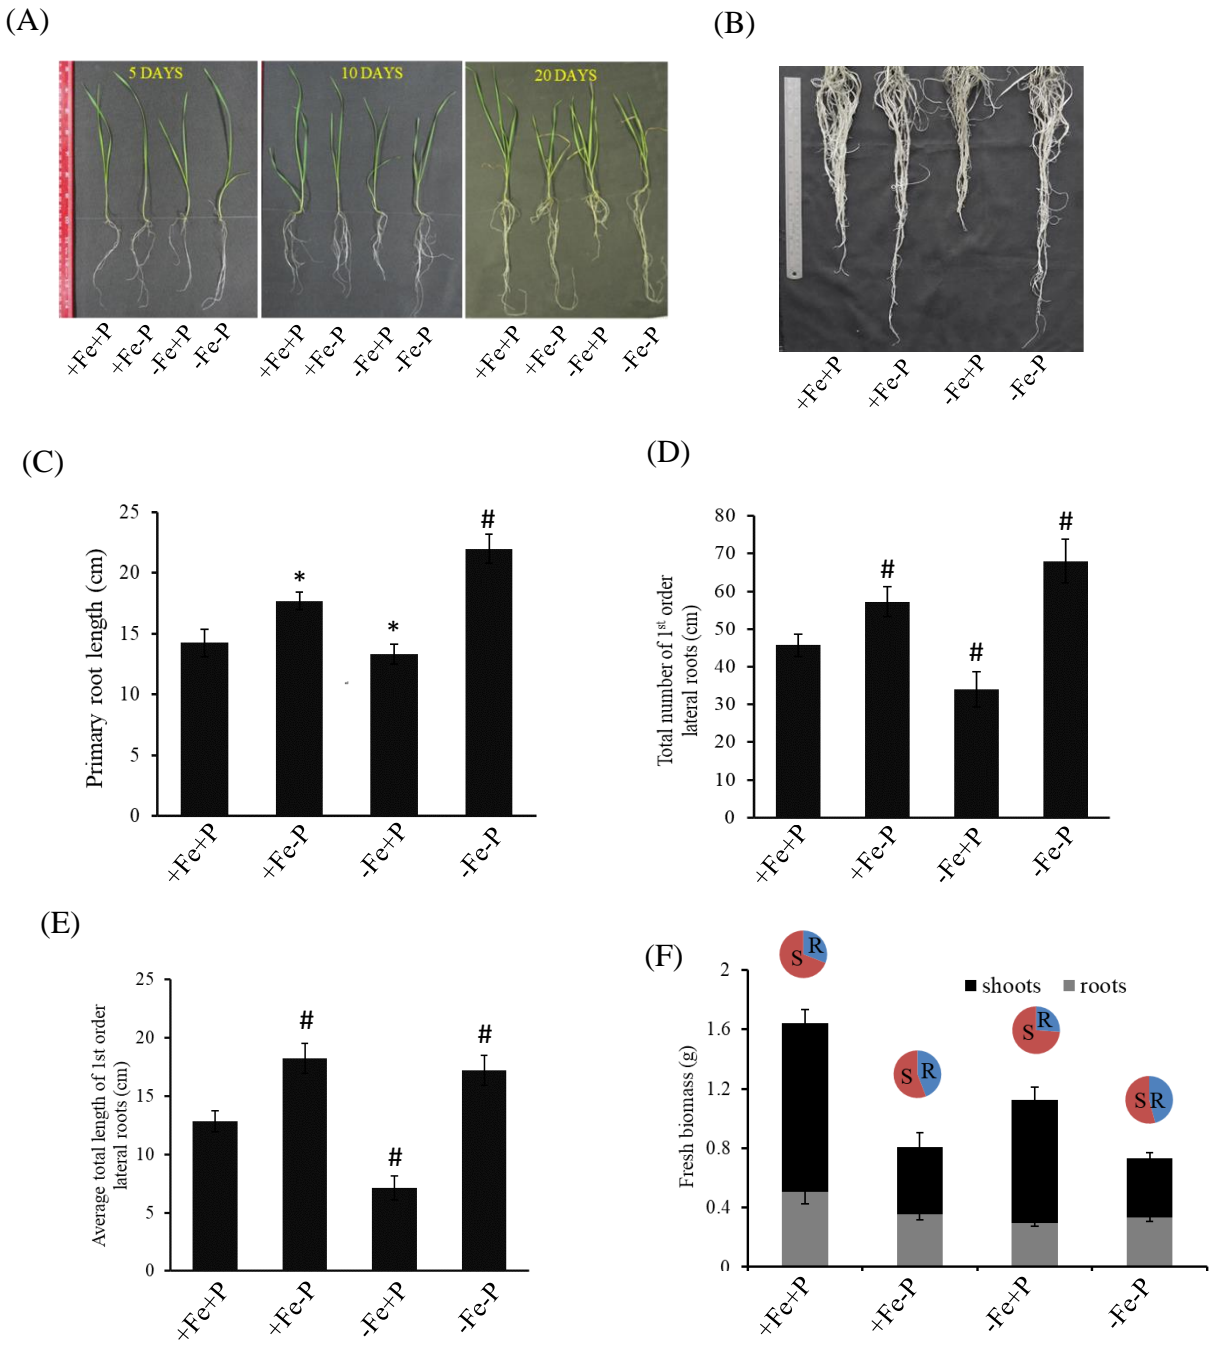

Figure 1



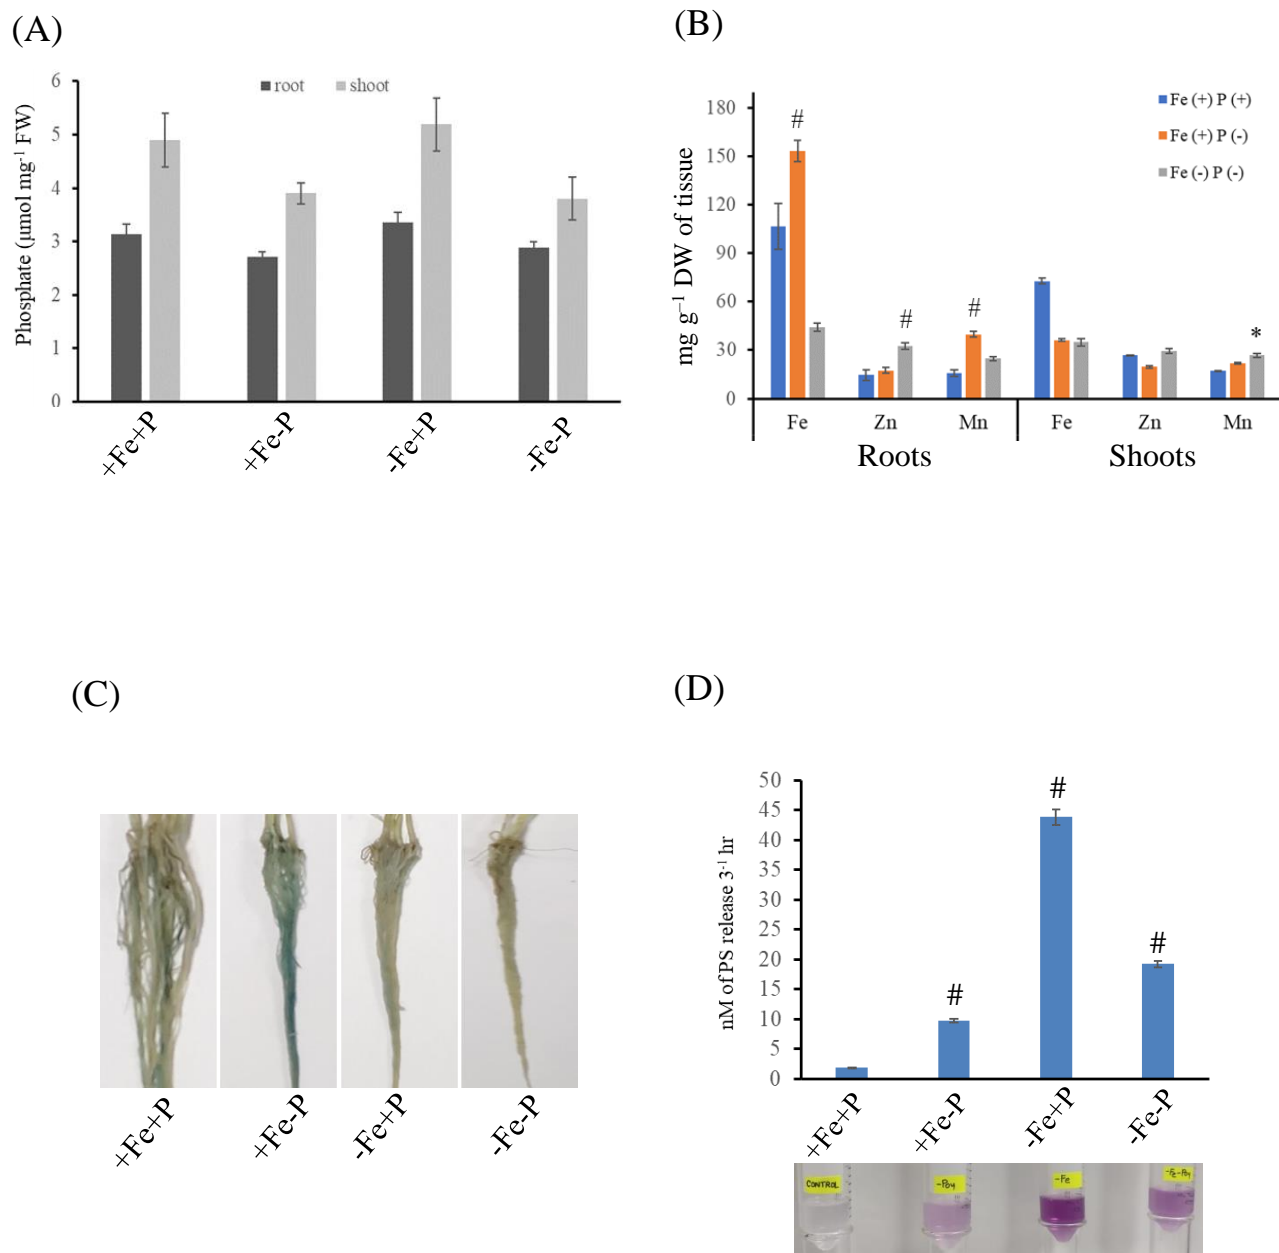

Figure 2

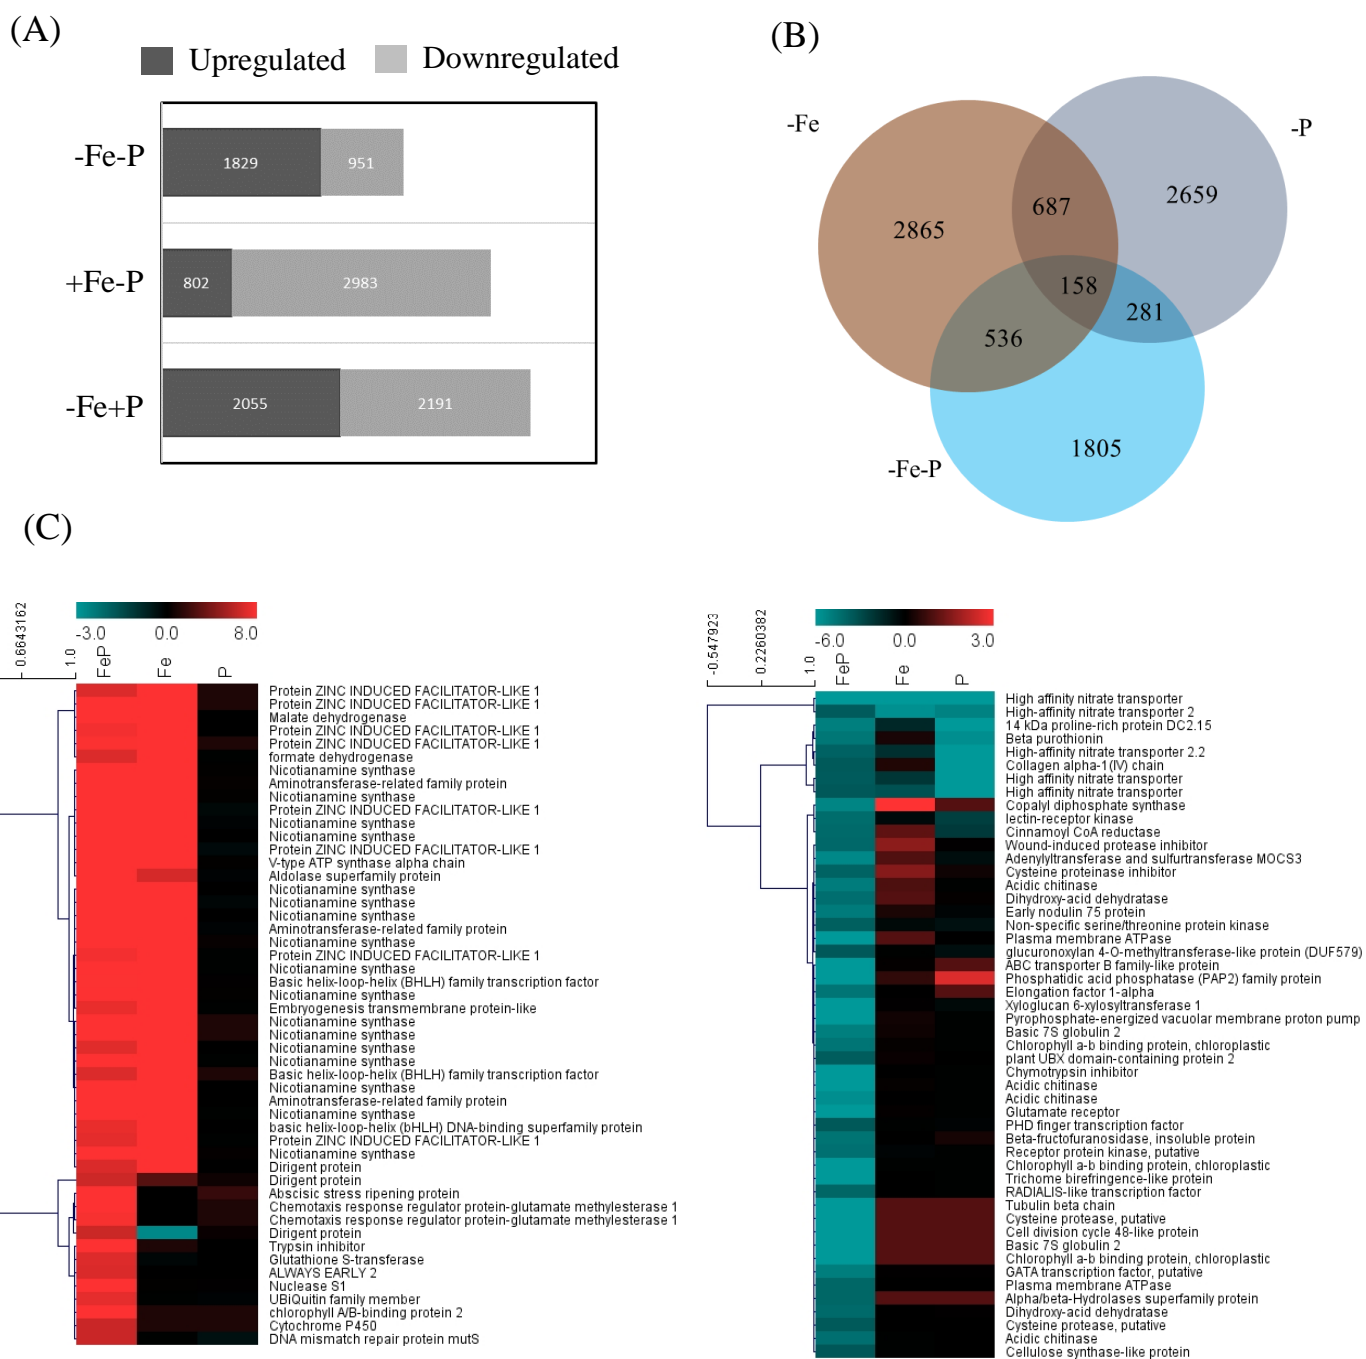

Figure 3

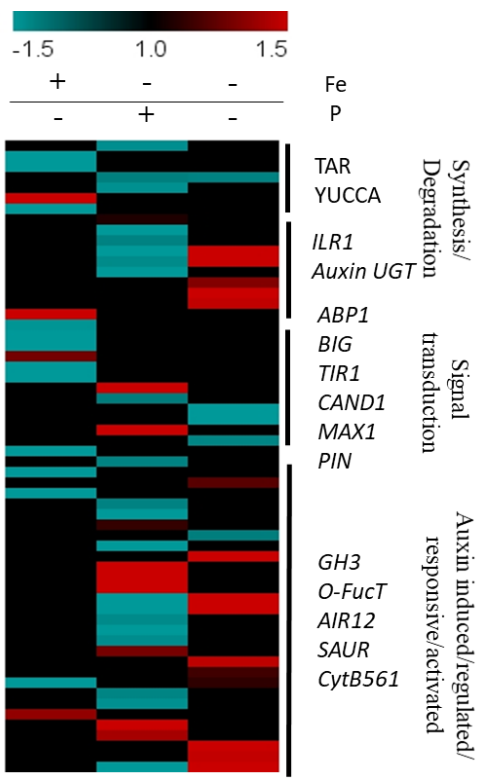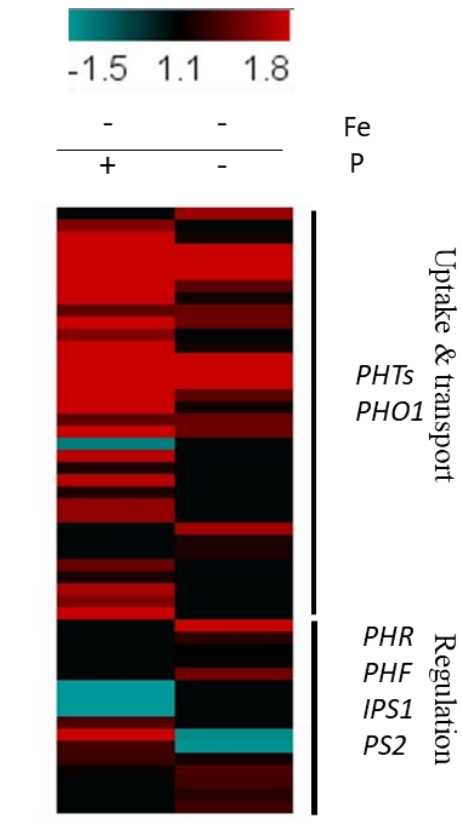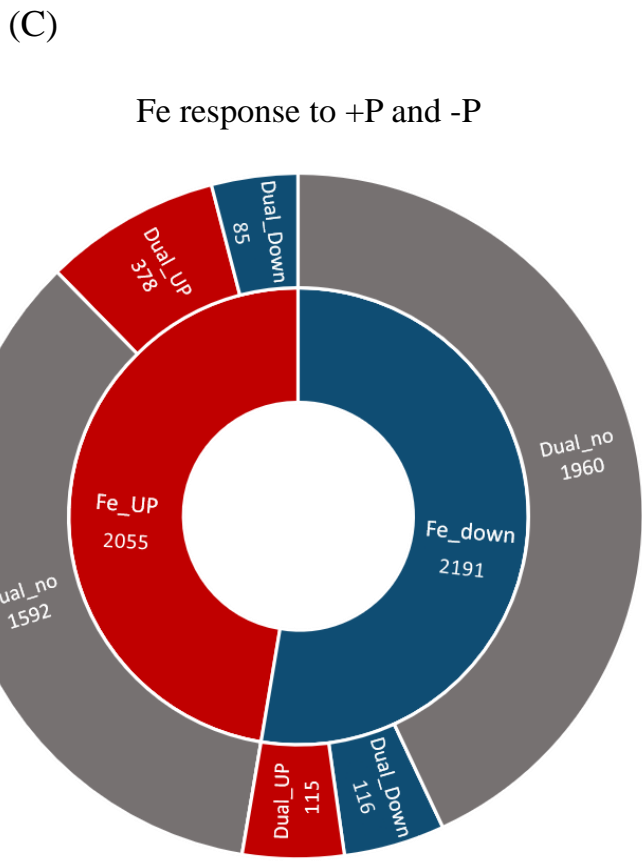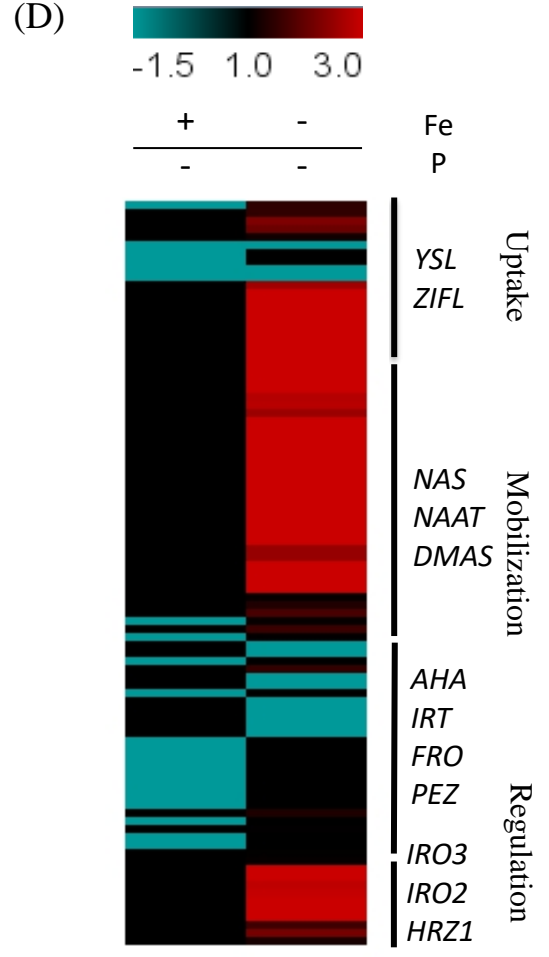

Figure 4

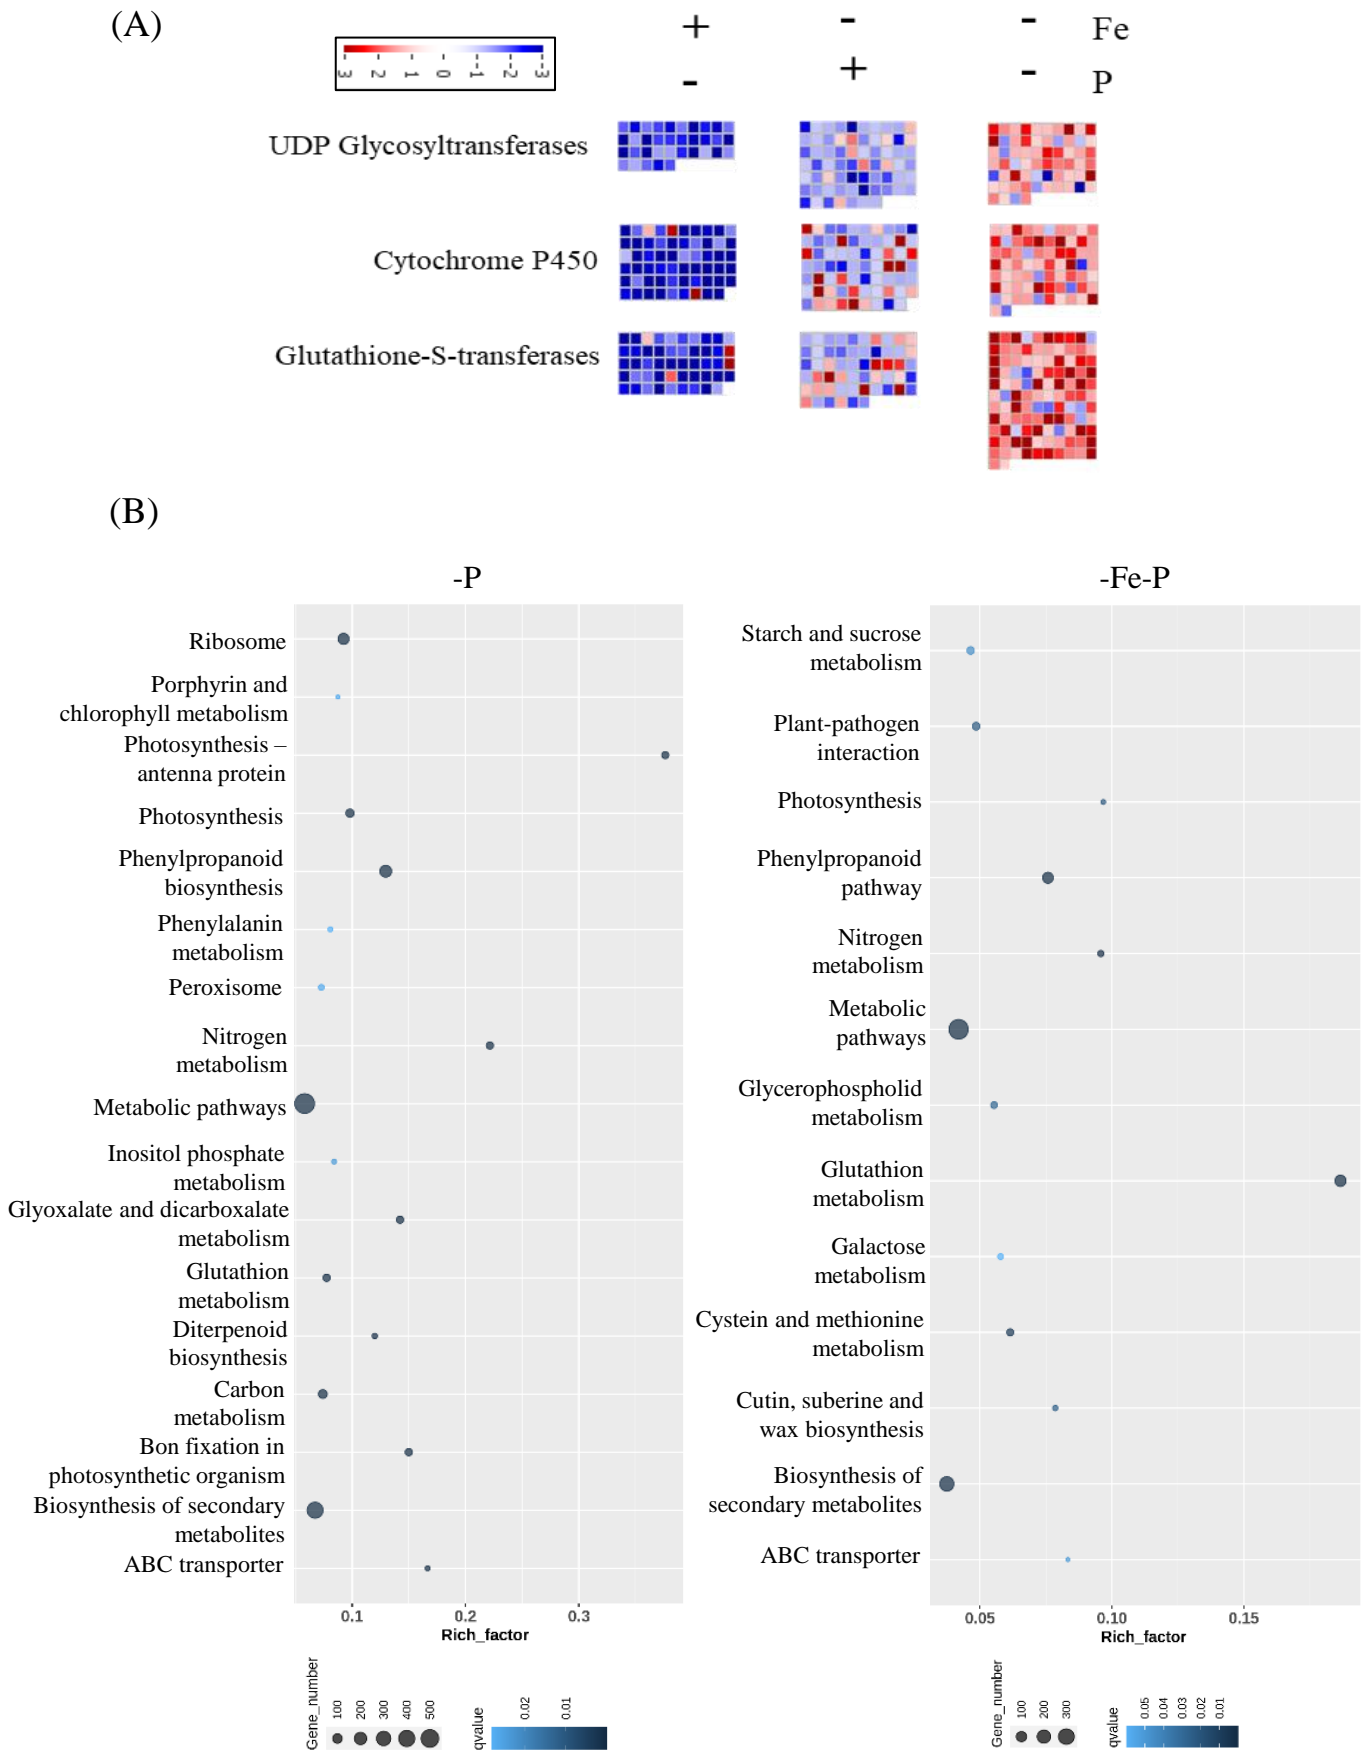

Figure 5

(A)

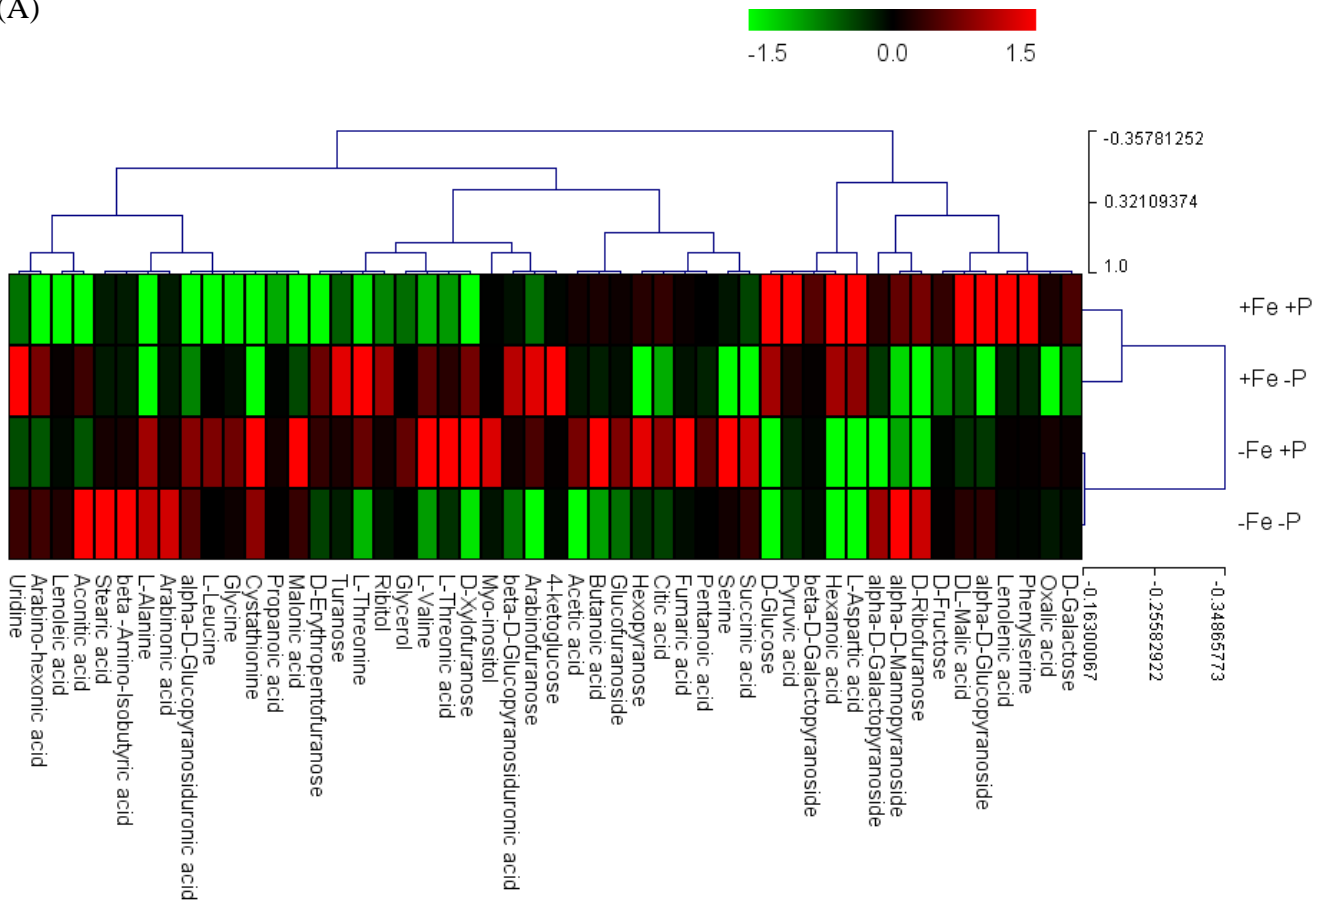

(B)

*Response specific to -Fe - P*

*Response common for -Fe and -Fe - P*

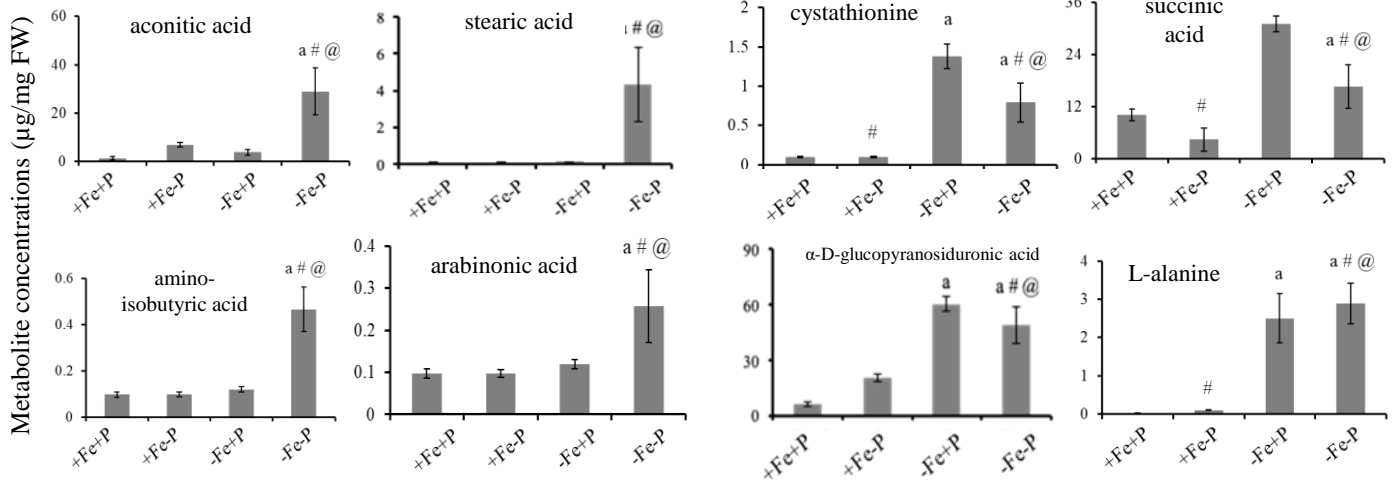

Figure 6

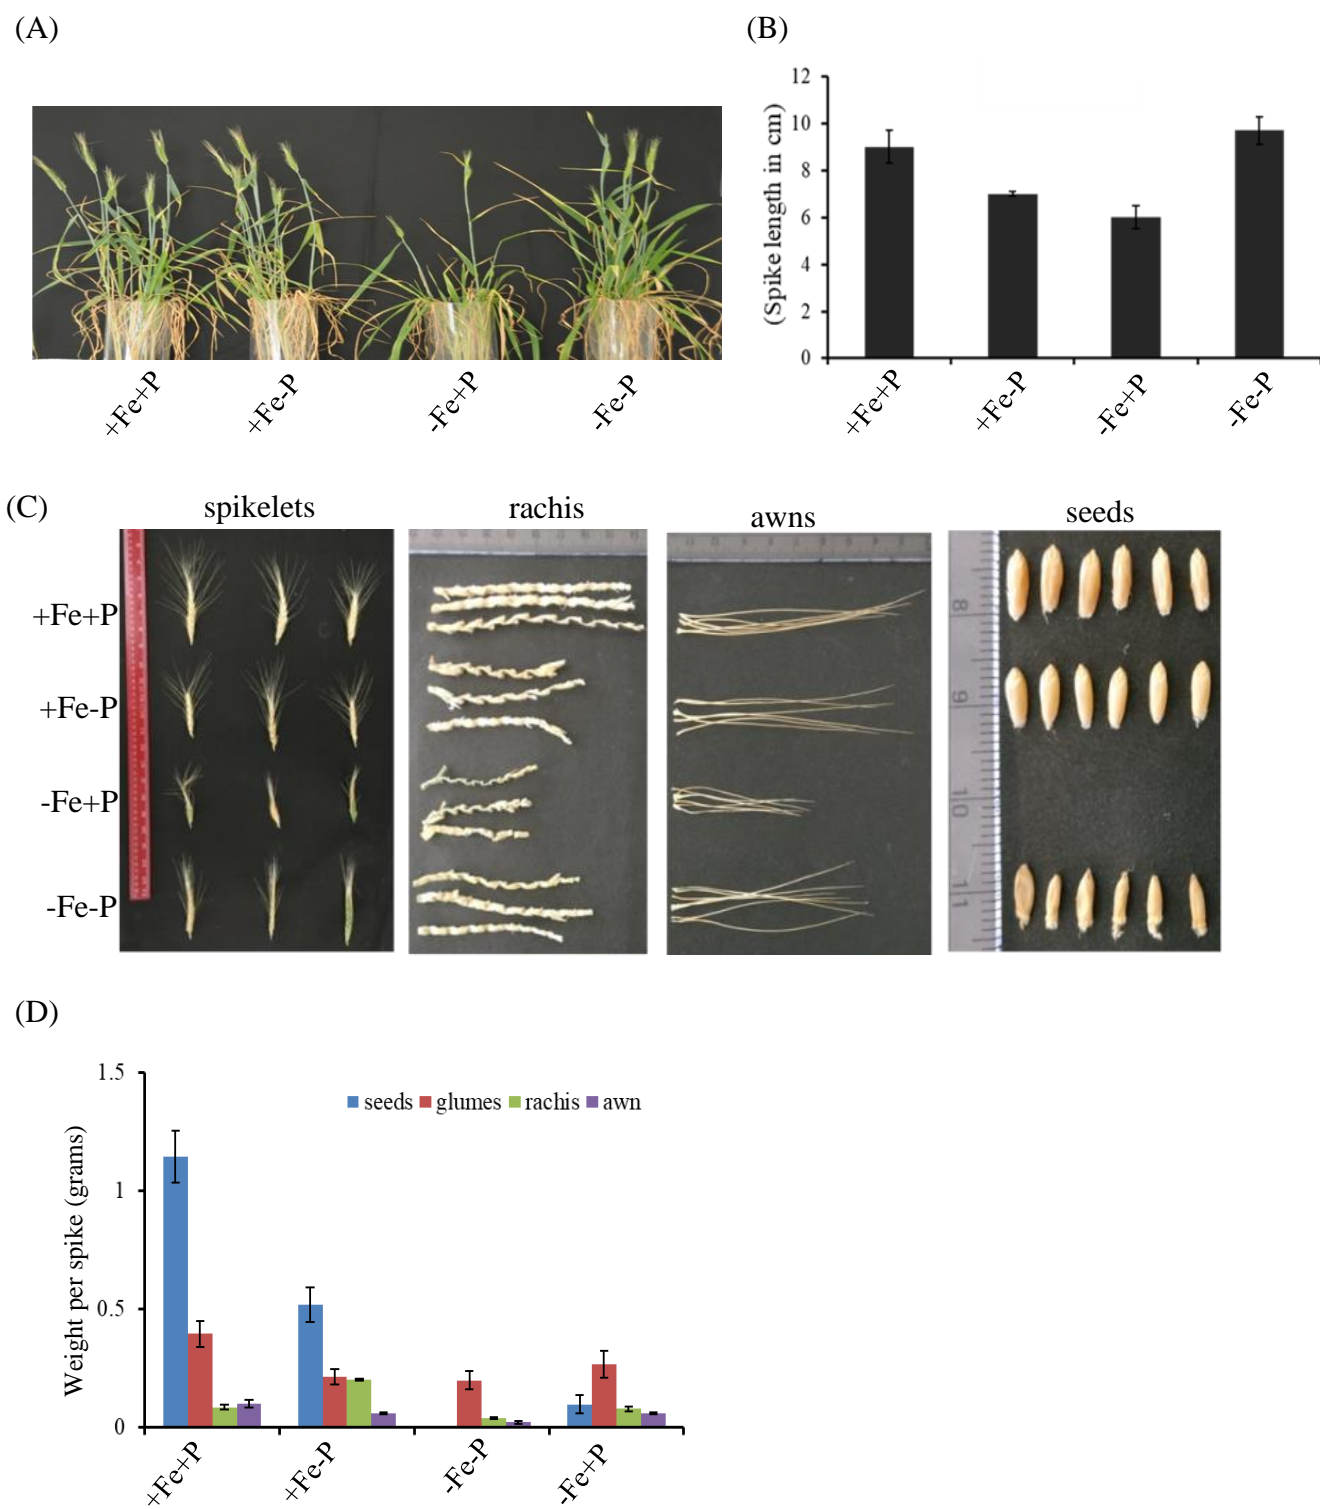

Figure 7
